# Supplementary material
Source: PubMed Central journal article supplement (PMC4278422)

Manuscript Number: FRBM-D-14-00520R1

Title: Nitrite Modulates Bacterial Antibiotic Susceptibility and Biofilm Formation in Association with Airway Epithelial Cells

Article Type: Original Research/ Original Contribution

Keywords: *Pseudomonas aeruginosa*; biofilm; sodium nitrite; colistimethate; colistin; polymyxin

Corresponding Author: Dr. Jennifer M Bomberger,

Corresponding Author's Institution: University of Pittsburgh

First Author: Anna Zemke

Order of Authors: Anna Zemke; Sruti Shiva; Jane L Burns; Samuel M Moskowitz; Joseph M Pilewski; Mark T Gladwin; Jennifer M Bomberger

Abstract: *Pseudomonas aeruginosa* is the major pathogenic bacteria in cystic fibrosis and other forms of bronchiectasis. Growth in antibiotic resistant biofilms contributes to the virulence of this organism. Sodium nitrite has antimicrobial properties and has been tolerated as a nebulized compound at high concentrations in human subjects with pulmonary hypertension; however, its effects have not been evaluated on biotic biofilms or in combination with other clinically useful antibiotics. We grew *P. aeruginosa* on the apical surface of primary human airway epithelial cells to test the efficacy of sodium nitrite against biotic biofilms. Nitrite alone prevented 99% of biofilm growth. We then identified significant cooperative interactions between nitrite and polymyxins. For *P. aeruginosa* growing on primary CF airway cells, combining nitrite and colistimethate resulted in an additional log of bacterial inhibition compared to treating with either agent alone. Nitrite and colistimethate additively inhibited oxygen consumption by *P. aeruginosa*. Surprisingly, while the antimicrobial effects of nitrite in planktonic, aerated cultures are nitric oxide (NO) dependent, antimicrobial effects in other growth conditions are not. The inhibitory effect of nitrite on bacterial oxygen consumption and biofilm growth did not require NO as an intermediate as chemically scavenging NO did not block growth inhibition. These data suggest an NO-radical independent nitrosative or oxidative inhibition of respiration. The combination of nebulized sodium nitrite and colistimethate may provide a novel therapy for chronic *P. aeruginosa* airway infections, because sodium nitrite, unlike other antibiotic respiratory chain 'poisons', can be safely nebulized at high concentration in humans.

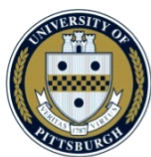

University of Pittsburgh

School of Medicine

Department of Microbiology and Molecular Genetics

Jennifer M. Bomberger, Ph.D.  
Bridgeside Point II, Rm. 416  
450 Technology Drive  
Pittsburgh, PA 15219  
Office: (412) 624-1963; Lab: (412) 624-1535  
jbomb@pitt.edu

July 2, 2014

Dr. Harry Ischiropoulos  
Associate Editor  
Free Radical Biology & Medicine Journal

Dear Dr. Ischiropoulos:

Attached please find our revised manuscript entitled "Nitrite modulates bacterial antibiotic susceptibility and biofilm formation in association with airway epithelial cells" by Anna Zemke, Sruti Shiva, Jane Burns, Samuel Moskowitz, Joseph Pilewski Mark Gladwin and Jennifer Bomberger (Manuscript No. FRBM-D-14-00520). We have addressed all of the comments by you and the reviewers, and we thank you for making important recommendations and suggestions. As a result of the revisions, the manuscript has greatly improved, and we hope it is now suitable for publication in the Free Radical Biology & Medicine Journal. Our responses to the comments are summarized below.

Reviewer #1:

1. The main issue I have is the title - I do not think that you have proved that nitrite is working through an NO independent mechanism. The evidence that you give for this is lack of inhibition of effect with CPTIO may be due to the inability of this substance to penetrate the biofilm in the experimental set-up. My understanding is that nitrate and nitrite will be toxic to *Pseudomonas* species if nitric oxide reductase enzymes are blocked. NO reductase rapidly reduced NO to N<sub>2</sub>O. Could it be that the polymyxin interferes with NO reductase? This could be determined by measuring the formation of N<sub>2</sub>O in these experiments, or, alternatively, looking at the effect of NO or an alternative NO donor when combined with the polymyxin antibiotic. At least the importance of *pseudomonas* NO reductase (which has been very well characterised - see <http://www.jbc.org/content/266/34/22785.short> by Braun - this paper shows that NO reductase inactivation is lethal to *pseudomonas* organisms exposed to nitrite) should be considered in the discussion.

**At the reviewer's request, we have modified the title of the manuscript. We have also addressed a potential role for *P. aeruginosa* NO reductase in regulating the antimicrobial effect we observe in anaerobic conditions in the Discussion section (lines 413-418) and have referenced the Braun manuscript in the Introduction (lines 108-109).**

**Regarding the concern that CPTIO does not penetrate the biofilm: CPTIO is added one hour into the biofilm assay at which point microcolonies have begun to form but there is no EPS at this point. The concern is quite valid, particularly if experiments were to be done studying the effect of CPTIO and nitrite on mature biofilms. Because of these concerns, we have changed the title as suggested, and discussed this technical aspect in more detail (lines 424-426).**

**It is quite possible that the inner membrane damage induced by polymyxins also block denitrification pathway activity, however due to methodological constraints we did not test this hypothesis. As the reviewer points out, this may be an additional reason why *P. aeruginosa* is more sensitive to nitrite and polymyxins under anaerobic conditions (see the data in Table 1).**

Reviewer #2:

1. Page 3, Line 4-6: This sentence is redundant since the issue elucidating the colistin effect was outlined one already in the prior paragraph.  
Figure text figure 5. Second last line. Replace "of" by "or".

**At the reviewer's request, we have corrected the described grammatical errors and removed the described text redundancy.**

2. Please expand the issue of nitrite toxicity in the discussion section since the applied concentrations (300mM) are exorbitant high.

**To address this important concern, we have performed additional experiments to measure the integrity of the airway epithelial barrier (via transepithelial electrical resistance measurements, TEER) and airway epithelial cytotoxicity (via lactate dehydrogenase release assays). Barrier function is a sensitive and early marker of epithelial dysfunction, so TEER measurements were done for both CFBE-wt and primary CF HBE cells. As reported in Figure 1F, epithelial barrier function was not compromised until 150 mM sodium nitrite for the CFBE-wt cell line and remained intact at 300 mM sodium nitrite in the primary CF HBE cells (noted in text). We retained the 150 mM concentration in Figure 1E to demonstrate that the antimicrobial effect of nitrite had plateaued by 50 mM, however because of concerns about cytotoxicity in later figures only concentrations at or below 50 mM were used with CFBE-wt cells. Lactate dehydrogenase (LDH) release assays were also performed as a secondary method to assess cytotoxicity and demonstrated no increase in LDH release with the sodium nitrite concentrations presented in the manuscript (data not shown). We have also added greater detail in the Results and Discussion sections to address concerns of cytotoxicity to the epithelium (see lines 382-390, 418-420).**

Reviewer #3:

1. Results presented in Figure 1: Can the authors calculate a dose-response relationship from the current data, which could show the LC50s for nitrite on biofilm formation?

**The potency of antibiotics (and a particular organisms' susceptibility to any particular antibiotic) is typically expressed as minimum inhibitory concentration (MIC) or minimum bactericidal concentration (MBC). There are no widely established methodologies for determining an MBC for biofilms in general or biotic biofilms specifically. Even less established are methodologies for determining values such as LC50 in biofilm models, consequently we are not reporting the data as an LC50.**

2. In Figure 1 very high nitrite concentrations were used as final concentrations. Is this toxic for any kind of cell - also including alveolar epithelium? What are dose-response curves for nitrite and alveolar epithelium particularly in comparison to bacteria.

**To address this important concern, we have performed additional experiments to measure the integrity of the airway epithelial barrier (via transepithelial electrical resistance measurements) and airway epithelial cytotoxicity (via lactate dehydrogenase release assays). Please see the response to Reviewer 2, comment 2 above.**

3. In Figure 1 very high millimolar concentrations were used to assess the toxicity on *Pseudomonas aeruginosa*. Using e.g. nitrite inhalation will such high concentrations be reached in the lungs? The review recalls from the authors previous studies that - at least in plasma - nitrite inhalation causes an increase in the micromolar range only. Please comment.

**The concentration of inhaled nitrite is slightly over 1 M and roughly 1 ml is inhaled. The airway surface liquid in a healthy lung is 7 ml, so low millimolar concentrations are probably achievable in the airway surface liquid. Because ASL cannot be sampled noninvasively, these are estimates. While Figure 1 goes up to 150 mM, the main effect is between 5-50mM. Low mM nitrite concentrations in this range in the airway surface liquid are likely achievable.**

4. In Figure 2 (effects for the combination of colistimethate and nitrite). Can the authors use e.g. 2-way ANOVA or any kind linear regression testing to assess the statistical effect of both treatments alone as well as their combination?

**At the reviewer's request, we have reanalyzed the results of Figure 2 and Figure 3, using a 2-way ANOVA (using GraphPad Prism software package). The data presented in both figures is significant, as assessed by 2-way ANOVA (Figure 2 p value of <0.0001 and Figure 3 p value of 0.0056, respectively).**

We thank you and the reviewers for the time and effort in reviewing our manuscript, and recommending the necessary additions and changes that resulted in improvement of the manuscript. We sincerely hope that our paper is now suitable for publication in the FRBM Journal.

Sincerely,

A handwritten signature in purple ink that reads "Jennifer Bomberger". The signature is cursive and stylized.

Jennifer Bomberger, PhD  
Assistant Professor  
Department of Microbiology and Molecular Genetics  
University of Pittsburgh School of Medicine

## \*Highlights (for review)

- Nitrite prevents *P. aeruginosa* biofilms on human CF airway epithelial cells.
- Nitrite and polymyxins additively inhibit bacterial respiration.
- Nitrite and colistimethate additively inhibit biofilm growth on airway cells.

1  
2

3 Nitrite Modulates Bacterial Antibiotic Susceptibility and Biofilm Formation in Association with Airway  
4 Epithelial Cells

5 Running title: Colistin and nitrite prevent *P. aeruginosa* biofilms

6  
7

8 Anna C Zemke<sup>1</sup>, Sruti Shiva<sup>2</sup>, Jane L. Burns<sup>3</sup>, Samuel M. Moskowitz<sup>4</sup>, Joseph M. Pilewski<sup>1</sup>, Mark T.  
9 Gladwin<sup>1,5</sup> and Jennifer M. Bomberger<sup>6</sup>

10

- 11 1. Division of Pulmonary, Allergy and Critical Care Medicine. University of Pittsburgh
- 12 2. Department of Pharmacology, University of Pittsburgh
- 13 3. Department of Pediatrics, University of Washington
- 14 4. Department of Pediatrics, Massachusetts General Hospital and Harvard Medical School
- 15 5. Pittsburgh Heart, Lung, Blood and Vascular Medicine Institute
- 16 6. Department of Microbiology and Molecular Genetics, University of Pittsburgh

17  
18

19 Corresponding author: Jennifer M. Bomberger  
20 jbomb@pitt.edu  
21 phone (412) 624-1963  
22 fax (412) 624-2139

23  
24  
25  
26

27 Conflict of interest: Dr. Gladwin is listed as a co-inventor on an NIH government patent for the use of  
28 nitrite salts in cardiovascular diseases. Dr. Gladwin consults with Mast-Aires Pharmaceuticals on the  
29 development of a phase II proof of concept trial using inhaled nitrite for pulmonary arterial hypertension.

30  
31

32 Funding acknowledgements:  
33 ACZ 2T32HL007563-26  
34 JLB, JMP P30DK072506,  
35 JMB R00HL098342-01, Breathe Pennsylvania Research Grant  
36 JMP Cystic Fibrosis Foundation  
37 MTG: R01HL098032, R01HL096973, and P01HL103455, T32 HL110849, the Institute for Transfusion  
38 Medicine and the Hemophilia Center of Western Pennsylvania.  
39 SMM: R01AI067653 and Cystic Fibrosis Foundation MOSKOW13P0

40

## Abstract

*Pseudomonas aeruginosa* is the major pathogenic bacteria in cystic fibrosis and other forms of bronchiectasis. Growth in antibiotic resistant biofilms contributes to the virulence of this organism. Sodium nitrite has antimicrobial properties and has been tolerated as a nebulized compound at high concentrations in human subjects with pulmonary hypertension; however, its effects have not been evaluated on biotic biofilms or in combination with other clinically useful antibiotics. We grew *P. aeruginosa* on the apical surface of primary human airway epithelial cells to test the efficacy of sodium nitrite against biotic biofilms. Nitrite alone prevented 99% of biofilm growth. We then identified significant cooperative interactions between nitrite and polymyxins. For *P. aeruginosa* growing on primary CF airway cells, combining nitrite and colistimethate resulted in an additional log of bacterial inhibition compared to treating with either agent alone. Nitrite and colistimethate additively inhibited oxygen consumption by *P. aeruginosa*. Surprisingly, while the antimicrobial effects of nitrite in planktonic, aerated cultures are nitric oxide (NO) dependent, antimicrobial effects in other growth conditions are not. The inhibitory effect of nitrite on bacterial oxygen consumption and biofilm growth did not require NO as an intermediate as chemically scavenging NO did not block growth inhibition. These data suggest an NO-radical independent nitrosative or oxidative inhibition of respiration. The combination of nebulized sodium nitrite and colistimethate may provide a novel therapy for chronic *P. aeruginosa* airway infections, because sodium nitrite, unlike other antibiotic respiratory chain 'poisons', can be safely nebulized at high concentration in humans.

### Keywords

*Pseudomonas aeruginosa*, biofilm, sodium nitrite, colistimethate, colistin, polymyxin

64  
65  
66  
67

## INTRODUCTION

68 In cystic fibrosis (CF), chronic airway infection results in bronchiectasis and cycles of airway  
69 inflammation that ultimately lead to early death from respiratory failure. *Pseudomonas aeruginosa* is the  
70 most common pathogen in teenagers and adults with CF. Once chronic airway infection is established, *P.*  
71 *aeruginosa* becomes very difficult to eradicate because of multiple resistance mechanisms including  
72 intrinsic antibiotic tolerance, selection of antibiotic-resistant subpopulations by decades of antibiotic  
73 exposure, and bacterial growth in biofilms (1-3).

74 The high metabolic activity of *P. aeruginosa* and neutrophils in and around mucus plaques  
75 depletes oxygen at the airway surface, such that biofilm growth is largely anaerobic, with bacteria  
76 subsisting through denitrification (4). *Ex vivo* evidence of denitrification in the airway was recently  
77 established by detecting nitrous oxide, a unique product of bacterial denitrification, in sputum samples  
78 from patients with CF (5). Anaerobic growth confers resistance to many antibiotics that clinicians  
79 commonly use against *P. aeruginosa*, in part through alterations in efflux pump expression (1, 6). Further  
80 complicating the search for new antimicrobial approaches to *P. aeruginosa* is the difference in behavior of  
81 biofilms grown in the presence of airway cells compared to those grown on abiotic surfaces (glass or  
82 plastic). The former, known as “biotic” biofilms, can be >100-fold more resistant to antibiotics than  
83 predicted by conventional susceptibility testing. This makes extrapolation of data derived from  
84 planktonic experiments difficult to translate to performance against biotic biofilms and limits our  
85 understanding of the *in vivo* activity of existing drugs (2).

86 Sodium nitrite has long been known to have antimicrobial properties as a food preservative.  
87 Nitrite may also contribute to host defense against *Helicobacter pylori* and *Clostridium difficile* (7, 8). The  
88 antimicrobial action of the nitrite moiety is due in part through generation of NO, inactivation of Fe-S  
89 containing proteins, and inhibition of bacterial respiration (9-11). Within the lung, inhaled nitrite salts  
90 are converted to NO through reductive reactions with heme- and molybdenum-containing enzymes such



91 as hemoglobin and xanthine oxidoreductase, and potentially through bacterial metabolism. NO has a  
92 half-life of milliseconds *in vivo* (reviewed in (12, 13)). There are ongoing attempts to adapt inhaled NO as  
93 an antimicrobial agent, but the short half-life makes delivery cumbersome (14, 15). Nitrite has a half-life  
94 of 50-60 minutes *in vivo* when delivered intravenously, allowing intermittent dosing (16). An ongoing  
95 Phase 2b clinical trial is currently evaluating the safety and efficacy of nebulized sodium nitrite in  
96 pulmonary hypertension; inhaled nitrite has thus far been well tolerated at concentrations near 1 molar  
97 (ClinicalTrials.gov locator NCT01431313, M. Gladwin personal communication). The availability of  
98 pharmaceutical-grade sodium nitrite for inhalation improves the feasibility of using nitrite as an  
99 antimicrobial agent in CF airway infection.

100 Previous work has shown that sodium nitrite has pH-dependent antimicrobial activity against *P.*  
101 *aeruginosa*, with activity at pH 6.5 being best studied (hereafter “nitrite” refers to sodium nitrite in  
102 solution at pH 6.5)(17). At micromolar concentrations, nitrite is a potential substrate for anaerobic  
103 energy generation through denitrification, however at millimolar concentrations it inhibits anaerobic  
104 growth (11, 18). Beyond direct bactericidal effects, nitrosative stress also affects virulence of *P.*  
105 *aeruginosa* by inactivating pyocyanin and increasing production of alginate (19, 20). Additionally, nitrite  
106 has antimicrobial activity against a wide variety of other pathogens found in CF, including *Burkholderia*  
107 *cepacia* complex and *Staphylococcus aureus* (21, 22). When nitric oxide reductase activity is lost, nitrite  
108 becomes growth inhibitory in *P. stutzeri* (23). Whether nitrite itself or the NO produced from nitrite can  
109 prevent biotic biofilm growth is unknown. The interactions between nitrite and commonly used  
110 antibiotics are also poorly understood. The goals of this study were to determine the effect of sodium  
111 nitrite on *P. aeruginosa* biotic biofilms and screen nitrite for interactions with other commonly used  
112 antibiotics in the CF population. We focused primarily on colistin because previous work has shown that  
113 it targets the inner core of highly structured abiotic biofilms where the oxygen tension is lowest,  
114 suggesting activity against anaerobically growing *P. aeruginosa* (24, 25). The effect of polymyxins on *P.*  
115 *aeruginosa* clinical isolates grown under anaerobic conditions has not been extensively studied but  
116 available data suggest decreased susceptibility when compared to aerobic growth (6).

117 Polymyxins are polycationic lipopeptide antibiotics that interact with negatively charged  
118 lipopolysaccharide at the outer membrane of Gram-negative bacteria. Polymyxins initially increase outer  
119 membrane permeability and, after diffusing across the periplasmic space, disrupt the inner (cytoplasmic)  
120 membrane. Bacterial death ensues within minutes (26). Colistimethate is a prodrug of colistin  
121 (polymyxin E) that can be administered by inhalation for the treatment of chronic airway infections in  
122 both CF and non-CF bronchiectasis (27). In 2005, 9% of CF patients in the United States routinely inhaled  
123 an aerosol form of intravenous colistimethate for the treatment of chronic airway infection, and as of  
124 2012, approximately 11% of adult CF patients were doing so (28, 29). A dry powder colistimethate  
125 inhaler approved to treat CF airway infection in Europe is designed to make delivery more convenient  
126 (30).

127 The primary objective of this study was to investigate the role of nitrite in preventing biotic  
128 biofilm growth and the potential interactions between nitrite and colistimethate. We tested the  
129 hypotheses (1) that the inhibition of biofilm growth by nitrite is NO-independent and (2) that the  
130 cooperative interaction between nitrite and colistimethate is due to NO independent respiratory  
131 inhibition.

## 132 MATERIALS AND METHODS

133  
134 **Bacterial strains:** The following bacterial strains were studied: *Pseudomonas aeruginosa* strains PA14  
135 and PA01 (gift of George O'Toole, Geisel School of Medicine at Dartmouth)(31), ten "late" *P. aeruginosa*  
136 clinical isolates from the University of Washington collection previously published in (32), 8 previously  
137 published *Achromobacter sp.* isolates and ten *Burkholderia sp.* isolates from the Cystic Fibrosis  
138 Foundation *Burkholderia cepacia* Research Laboratory and Repository at the University of Michigan (33)  
139 and colistin resistant *P. aeruginosa* isolates (described in (34)).

140 **Reagents:** Colistin sulfate, sodium nitrite, hydrogen peroxide, potassium cyanide, sodium azide,  
141 paraquat, Luria broth (LB), Luria broth agar, polymyxin B sulfate and polymyxin b nonapeptide were all  
142 obtained from Sigma (St. Louis MO), Other reagents obtained as follows: colistimethate (XGen

143 pharmaceuticals, Lot A72649 and A99296, Big Flats NY), Carboxy-PTIO (Cayman Chemicals, Ann Arbor  
144 MI).

145 **Bacterial Growth Methods:** 5ml bacterial cultures were grown on a roller drum at 100 rpm for 16-18  
146 hours prior to the start of the experiment in LB. Unless otherwise indicated, bacteria were “returned to  
147 log phase” by diluting overnight cultures 1:100 in fresh LB and placing cultures on a roller drum at 37°C  
148 for 2 hours. During experiments combining colistimethate, colistin sulfate, azide, cyanide and CPTIO,  
149 200µl of “log phase” cultures were grown for additional 5.5 hours in a 96 well plate at 37°C on a nutating  
150 rocker.

151 **Biotic Biofilm Imaging:** To image epithelial-bacterial co-cultures, live-cell imaging was used as  
152 described in (31). Briefly, we used a FCS2 closed system, live-cell chamber from Biopetechs (Butler, PA).  
153 The immortalized human bronchial cell line (CFBE41o-) derived from a  $\Delta F508/\Delta F508$  patient with  
154 stable expression of wild-type CFTR was used (gift from Bruce Stanton, referred to as CFBE-wt). Biofilms  
155 of GFP expressing *P. aeruginosa* strain PAO1 were grown on CFBE-wt cells seeded onto glass coverslips in  
156 a flow chamber. Bacteria were inoculated at approximately 25 MOI and allowed to attach to airway  
157 epithelial cells for two hours without media flowing. Biofilms were then grown for four hours with  
158 minimum essential media (MEM) flowing at 20 ml/hr. After a total of six hours, z-stack images were  
159 taken of 6-10 random fields from each chamber using a Nikon Ti-inverted microscope. Biofilm biomass  
160 was measured with COMSTAT image analysis software(35). Nitrite treated chambers were exposed to  
161 15mM sodium nitrite in pH 6.5 minimal essential medium for 4 hours following bacterial attachment,  
162 while control chambers were exposed to pH 6.5 MEM alone. The experiment was done in triplicate.  
163 More detail for this protocol can be found in the descriptions by Moreau-Marquis (31, 36).

164 **Liquid Culture Experiments:** For time-kill assays to measure bactericidal activity of polymyxins with  
165 other compounds, overnight cultures were diluted in pH 6.5 LB, returned to log phase growth at 37°C,  
166 and then treated with nitrite and/or polymyxins and grown for an additional 5.5 hours. The number of  
167 live bacteria was then determined by plating in a colony forming unit assay (CFU assay). For nitrite  
168 pretreatment assays: bacteria were grown as above in 15mM nitrite and after 5.5 hours the cultures were

169 pelleted at 6000xg for 5 min and re-suspended in media containing colistimethate. The cultures were  
170 then incubated for 60 minutes and bacteria were counted in a CFU assay.

171 **Co-culture experiments:** Conducted as previously described (31) with the following modifications:.

172 Primary human bronchial epithelial cells (HBE) were cultured from explanted lungs of patients with CF,  
173 under an Institutional Review Board approved protocol at the University of Pittsburgh (PRO11070367  
174 and IRB970946). Cells were enzymatically dissociated, expanded in growth media, and seeded onto  
175 Transwell inserts at air-liquid interface. Cultures were used when well polarized and differentiated (37).  
176 For other experiments, the cell line CFBE-wt stably expressing wild-type CFTR were used as described  
177 (31). CFBE-wt cells were seeded onto Transwell filters, grown at air-liquid interface, and used 7-10 days  
178 after seeding. Both cell lines were used in *P. aeruginosa* – epithelial co-culture experiments as follows  
179 (described in detail in (31)). Biofilm prevention assays were done as follows: overnight cultures of *PAO1*  
180 were rinsed once and added to the apical surface of the epithelial cells in 500 $\mu$ l of minimal essential  
181 media with glutamate at an MOI of 25. After the 60 minute bacterial attachment period, developing  
182 biofilms were treated with 300 mM sodium nitrite, 20 $\mu$ g/ml colistimethate, both agents or 300mM  
183 sodium chloride as a tonicity control for the subsequent 5 hours. At the end of this period, biofilms were  
184 removed with 0.1% Triton-X 100 and live bacteria were plated in a colony forming unit assay.

185 **Agar Dilution MIC under aerobic and anaerobic conditions:** Agar dilution minimum inhibitory  
186 concentration (MIC) experiments were used to screen multiple clinical isolates for nitrite/polymyxin  
187 cooperativity. The MIC protocol by Wiegand et al. was used with the following modifications (38).  
188 Checkerboards included two-fold dilutions of colistin sulfate from 0.125 $\mu$ g/ml to 16 $\mu$ g/ml. Nitrite  
189 concentrations from 0.5mM to 32mM were used. The pH of molten agar was adjusted to pH 6.5 with HCl.  
190 The agar was cooled to 50°C and increasing concentrations of colistin sulfate and/or nitrite were added.  
191 Plates were poured and used immediately. For aerobic experiments, plates were read 18 -20 hours  
192 later. For highly colistin resistant isolates, plates were grown for 48-72 hours because control growth of  
193 these organisms is very slow. To determine anaerobic MICs for *Pseudomonas aeruginosa* clinical isolates,

194 MHB plates were made as described above with the addition of 1% potassium nitrate (Sigma). An  
195 anaerobic environment was created using GasPak EZ Anaerobe Container System and BBL Dry Anaerobic  
196 Indicator Strips (BD Franklin Lakes, NJ) were used for every experiment to assure an anaerobic  
197 environment. Plates were incubated for 2 days for anaerobic MIC determinations.

198 **Oxygen Consumption measurements:** Bacteria were diluted in LB and treated with nitrite and/or  
199 colistimethate for 30 min at 37°C. Oxygen consumption was measured with a Clark-type Instech Oxygen  
200 Electrode, model #125-05 with a YSE Biological Oxygen Monitor, model 5300A and calculated from the  
201 slope. Measurements were done in triplicate on different days and data are displayed as % control  
202 oxygen consumption with all points from each day normalized to the control oxygen consumption from  
203 that day. Representative tracings show the raw data. The tracing have been overlayed for easier visual  
204 comparison.

205 **Cytotoxicity Assays:** Lactate dehydrogenase release assays were done using the CytoTox 96 Non-  
206 Radioactive Cytotoxicity Assay kit (Promega Madison, WI), following the manufacturer's instructions.

207 **Transepithelial Electrical Resistance Measurements:** Transepithelial electrical resistance (TEER) was  
208 measured hourly for five hours on air-liquid interface differentiated CFBE-wt airway epithelial cells and  
209 primary human airway epithelial cells (HBE) treated with sodium nitrite or sodium chloride using a  
210 Ag/AgCl electrode (EVOM meter).

211 **Statistics:** All data are plotted as mean +/- standard deviation. Data were log transformed and tested by  
212 one-way ANOVA for an effect (or two-way ANOVA as applicable). If an effect was present, a Tukey test  
213 was used for individual comparisons using PRISM software (La Jolla, California).

## 215 RESULTS

216  
217 **Nitrite prevents *P. aeruginosa* biofilm formation on airway epithelial cells.**

218 To test the ability of nitrite to prevent biofilm formation on airway epithelial cells, immortalized human  
219 airway cells were grown as a confluent monolayer on glass coverslips. The *P. aeruginosa* strain PAO1  
220 stably expressing green fluorescent protein (PAO1-GFP) was added to the surface of these cells in a flow  
221 chamber and biofilm development was imaged as described (31). Under control conditions, robust  
222 biofilm growth (seen in green in Figures 1A and 1C) is seen. In the presence of 15mM sodium nitrite,  
223 biofilm growth was nearly absent (Figure 1B and 1D). Quantification of biofilm biomass revealed a 90%  
224 reduction in biomass (numbers on panels 1C and 1D). *P. aeruginosa* biofilms grown in this model have  
225 been previously characterized for expression of biofilm marker genes (*tolA*), repression of planktonic  
226 marker genes (*fliC*), exopolysaccharide production and increased antibiotic resistance (31). To define the  
227 dose-response relationship, a static co-culture system was used where *P. aeruginosa* biofilms were grown  
228 on airway epithelial cells at an air-liquid interface for five hours (31). Dose-dependent prevention of  
229 biofilm growth was observed in the range of 1.5 and 50 mM nitrite, with an effect ceiling at 50 mM nitrite  
230 (Figure 1E). Transepithelial electrical resistance (TEER), a measure of epithelial barrier integrity,  
231 decreased in CFBE-wt cells at nitrite doses exceeding 50 mM (Figure 1F), but there was no consistent  
232 LDH release at doses up to 150 mM (data not shown). Further CFBE-wt experiments were conducted  
233 with nitrite concentrations below 50mM. Of note, comparable decreases in transepithelial electrical  
234 resistance were seen with sodium chloride at the same concentrations, so the decrease in TEER may be  
235 due to hypertonicity rather than nitrite per se.

236  
237 **Colistin sulfate demonstrates cooperative antimicrobial activity with nitrite against biotic**  
238 **biofilms.** Colistimethate is in wide clinical use as an inhaled antibiotic, and previous work has shown  
239 antimicrobial activity against abiotic biofilms (24, 25). The magnitude of activity of polymyxins against  
240 biotic biofilms (i.e. biofilms grown in association with airway epithelial cells) is not known, so we used  
241 the static co-culture system to test the ability of colistin to disrupt established biofilms. Figure 2A shows  
242 that 2 µg/ml colistin sulfate disrupted one-half log of mature biofilm, while 20 µg/ml colistin sulfate  
243 disrupted 3 logs (or 99.9%) of established biofilms. The airway concentration of active polymyxin

244 achieved through colistimethate nebulization are poorly characterized, however estimated  
245 concentrations of colistin are near 10-20  $\mu\text{g}/\text{ml}$  (39, 40). In comparison to reported data using the  
246 identical model system, the biotic biofilm antimicrobial activity of colistin sulfate was 2 logs better than  
247 that reported for imipenem, 1 log better than ciprofloxacin and comparable to tobramycin at doses that  
248 are achieved in the airway (31).

249 We next examined if nitrite could improve the antimicrobial activity of polymyxins. To determine  
250 the interaction between polymyxins and nitrite, modified time-kill assays were used. Robust growth was  
251 seen in the presence of up to 30 mM nitrite. No bacterial killing was seen with 70 $\mu\text{g}/\text{ml}$  colistimethate  
252 (CMS) or 1.5  $\mu\text{g}/\text{ml}$  colistin sulfate (COL) in well aerated cultures (doses that are subinhibitory in *P.*  
253 *aeruginosa* PA14 under these conditions). However, when nitrite was combined with subinhibitory  
254 concentrations of colistin sulfate (Figure 2B) or colistimethate (Figure 2C) up to 4 additional logs of  
255 bacteria were killed. Representative images of cultures grown with 15mM nitrite, 20  $\mu\text{g}/\text{ml}$   
256 colistimethate or both agents are shown in Figure 2D, demonstrating large differences in turbidity.  
257 Similarly, increased bacterial killing was seen with polymyxin B and 12mM nitrite at sub-inhibitory  
258 concentrations of both compounds (Figure 4B). These results suggest that nitrite and polymyxins may  
259 have cooperative antimicrobial activity.

260 Because there is great diversity in the antibiotic susceptibility of bacterial clinical isolates, we used  
261 agar dilution checkerboard testing to assess for antimicrobial synergy in a collection of *P. aeruginosa*  
262 clinical isolates from cystic fibrosis patients. Synergy is defined as a Fractional Inhibitory Concentration  
263 (FIC) of  $\leq 0.5$ . FIC is calculated by dividing the MIC of each drug when used in combination with the MIC  
264 of each drug when used alone. Anaerobic MICs were determined adding 1%  $\text{KNO}_3$  to the growth media  
265 to support denitrification and growing the plates for 48 hours prior to interpretation to account for  
266 slower growth under anaerobic conditions. Three isolates grew too slowly anaerobically to give  
267 interpretable MICs by this method. Eight of nine isolates were more susceptible to colistin under  
268 anaerobic conditions. In addition, isolates were 2-4 fold more susceptible to nitrite under anaerobic  
269 conditions, in agreement with previously published data (17). Only the lab strain PA14 grown under

270 anaerobic conditions met the FIC cutoff of 0.5 that defines synergy. The MIC was very consistently  
271 lowered by 2-fold when nitrite and colistin were combined (corresponds to the FICs of >0.5 and <1). The  
272 FIC cutoff of 0.5 was set in part to account for the 1 dilution variation that is accepted for MIC assays. In  
273 these experiments, we consistently saw a 1-dilution decrease (and never an increase) in colistin sulfate  
274 MIC when subinhibitory nitrite was present. Despite not meeting the 0.5 FIC threshold for synergy, the  
275 consistent decrease in MIC suggested that nitrite and colistimethate might have cooperative activity  
276 against biofilms.

277 To determine whether nitrite would confer polymyxin susceptibility to bacteria with high innate  
278 polymyxin resistance, eight highly colistin resistant clinical isolates were also tested under aerobic  
279 conditions in the presence of nitrite. All isolates had a colistin MIC >512 µg/ml in both the presence and  
280 absence of 3 mM (subinhibitory) sodium nitrite. *Achromobacter spp.* and *Burkholderia spp.* are pathogens  
281 that are difficult to treat within the CF population because of high innate antibiotic resistance.  
282 *Burkholderia spp.* have high innate resistance to polymyxins. Accordingly, the MIC to colistin was >512  
283 µg/ml with or without nitrite, although growth of these organisms was inhibited by 18 mM nitrite alone.  
284 Amongst *Achromobacter spp.*, increased susceptibility to colistin in the presence of nitrite was seen in 4 of  
285 8 clinical isolates (Supplementary Table 1). Taken together, among isolates of *P. aeruginosa* that do not  
286 have high innate polymyxin resistance, nitrite increases the susceptibility to polymyxins for a majority of  
287 isolates, and for some of the *Achromobacter* isolates.

288 Biofilms grow more robustly on CF airway cells than on those expressing wild-type CFTR (31).  
289 We have shown that nitrite causes an increase in susceptibility to colistin in planktonic culture and on  
290 nutrient agar. To determine whether nitrite augmented the antimicrobial activity of polymyxins for  
291 biotic biofilms on primary CF HBE cells, the polymyxin pro-drug colistimethate was combined with  
292 nitrite in a biofilm prevention assay (Figure 3). In this experiment, bacteria were allowed to attach to the  
293 surface of primary CF HBE cells for one hour. The developing biofilms were then treated with nitrite,  
294 colistimethate or both agents. When nitrite was not used, sodium chloride was added to control for  
295 tonicity. Nitrite alone prevented 1-2 logs of bacterial biofilm growth. Of note, primary CF HBE cells



296 tolerate higher concentrations of nitrite than CFBE-wt cells. Transepithelial electrical resistance did not  
297 drop with up to 300 mM nitrite (control TEER 678 mΩ•cm<sup>2</sup> vs 300 mM nitrite 597 mΩ•cm<sup>2</sup>).  
298 Colistimethate (20 μg/ml) prevented 3 logs of growth and the combination of the agents prevented 4 logs  
299 of growth. The cooperative effect of this combination in biofilm prevention led us to undertake further  
300 mechanistic studies of nitrite and colistimethate.

301  
302 **Nitrite and polymyxins additively inhibit bacterial respiration.** Nitrite has many effects on bacterial  
303 physiology. In the case of *P. aeruginosa*, concentrations of nitrite in the 1-20 mM range inhibit aerobic  
304 respiration (as measured by NADH oxidase activity), oxygen uptake, and both aerobic and anaerobic  
305 growth (11, 18, 41, 42). Polymyxins initially bind to the outer membrane and increase its permeability;  
306 subsequently they disrupt the cytoplasmic membrane (43). Polymyxins appear to inhibit bacterial  
307 respiration, presumably a consequence of damage to the cytoplasmic membrane (26). To explore the  
308 mechanism of action of combined nitrite and colistin, we tested the hypotheses that (1) polymyxins  
309 increase outer membrane permeability and thus promote increased intracellular concentrations of nitrite  
310 and (2) polymyxins and nitrite cooperatively inhibit bacterial respiration to exert antimicrobial activity.

311 If increased bacterial killing by nitrite and colistin were a consequence of increased intracellular  
312 nitrite concentration, then nitrite and colistin would need to be present simultaneously for increased  
313 killing to occur. To test this prediction, bacteria were treated with 15 mM nitrite, rinsed and treated with  
314 increasing concentrations of colistimethate in aerobic culture. Pretreatment with nitrite increases the  
315 susceptibility to colistimethate (Figure 4A). The timing of these effects excludes increased intracellular  
316 concentration of nitrite due to polymyxins because extracellular nitrite has been removed from the  
317 system prior to exposure to colistimethate. Polymyxin B nonapeptide, which lacks a lipid tail, increases  
318 outer membrane permeability without causing bacterial death or cytoplasmic membrane damage (44).  
319 Increased susceptibility to polymyxin b nonapeptide was not seen with nitrite (Figure 4B) in contrast to  
320 the increased bacterial killing seen with the parent compound polymyxin b and nitrite in a time-kill assay.  
321 The lack of killing in combination with polymyxin b nonapeptide and the increased susceptibility to

322 polymyxins with nitrite pretreatment both exclude increased intracellular accessibility to nitrite as a  
323 cause of this effect.

324 Both nitrite and polymyxins inhibit bacterial respiration, although in the case of polymyxins this  
325 may be a secondary effect to massive cytoplasmic membrane damage. We next tested if other agents that  
326 inhibit cellular respiration sensitize *P. aeruginosa* to polymyxins. In time-kill assays, the combinations of  
327 colistin sulfate and colistimethate with potassium cyanide or sodium azide all showed at least 4 logs of  
328 additional killing than any of the agents alone (Figure 5A). To show more quantitatively that nitrite and  
329 polymyxins were inhibiting respiration, oxygen consumption was measured. For these experiments low  
330 concentrations of nitrite and colistimethate were chosen that did not affect overall bacterial viability in  
331 combination so that the oxygen consumption measurements would not be confounded by bacterial death.  
332 Nitrite, as previously described, inhibits oxygen consumption with a linear dose-response at  
333 concentrations below the MIC as measured using a Clark-type electrode (representative tracings shown  
334 in Figure 5B). 5mM nitrite and 30 $\mu$ g/ml colistimethate both cause a 20% reduction in oxygen uptake  
335 under the conditions tested. In combination the agents caused a statistically significant, 50% decrease in  
336 oxygen uptake (Figure 5C). Next, to determine if the effect was NO dependent, the scavenger CPTIO was  
337 added in modified time-kill assays. As shown in Figure 5D, CPTIO did not block the increased bacterial  
338 killing by nitrite with colistimethate. Similar results were obtained using oxyhemoglobin as the  
339 scavenger (data not shown). If respiratory blockade were part of the mechanism, then respiratory  
340 blockade in this situation should also be independent of NO. As shown in Figure 5E, treatment of cultures  
341 with CPTIO and hemoglobin did not protect *P. aeruginosa* against the inhibitory effects of nitrite on  
342 oxygen uptake.

#### 344 **Anti-biofilm effects of nitrite are NO independent.**

345 Previous work indicates that scavenging NO prevents the anti-bacterial effects of nitrite on *P.*  
346 *aeruginosa* in planktonic culture(17). First we determined the nitrite concentrations required for growth  
347 inhibition in this system by exposing aerated, planktonic cultures of *P. aeruginosa* to increasing

348 concentrations of nitrite (Figure 6A). Similar to the previous work, introduction of NO scavengers  
349 (hemoglobin and CPTIO) protected *P. aeruginosa* against nitrite induced growth inhibition (Figure 6B).  
350 Because the metabolic demands of biotic biofilm lifestyle differ from those of a planktonic lifestyle, we  
351 next examined whether biofilm prevention by nitrite was also dependent on NO. In contrast to the effects  
352 of nitrite under aerobic conditions, the addition of 1 mM CPTIO (far in excess of the 500 nM NO generated  
353 by nitrite in culture as reported in (17)) did not protect biotic biofilms from the activity of nitrite (Figure  
354 6C). In conclusion, nitrite prevents *P. aeruginosa* biofilm formation on the apical surface of airway  
355 epithelial cells. Unlike the antibacterial activity in aerated planktonic culture, scavenging NO does not  
356 block the antibacterial activity of nitrite under biofilm conditions.

## 357 358 **DISCUSSION**

359 We have demonstrated that sodium nitrite prevents biotic biofilm formation by *P. aeruginosa* grown  
360 on the surface of CF primary human airway cells. While it was previously known that nitrite could inhibit  
361 growth of *P. aeruginosa* in planktonic conditions, in abiotic biofilms and in expectorated sputum, this is  
362 the first demonstration of antimicrobial activity against biotic biofilms. In concordance with previously  
363 published work, we found that anaerobic conditions increased the susceptibility of *P. aeruginosa* to  
364 nitrite. The oxygen tension in our epithelial co-culture systems is very low as the perfusate for the flow  
365 chamber is not actively oxygenated and the static co-cultures are submerged under several millimeters of  
366 media despite having  $>10^6$  metabolically active bacteria/ml growing on the surface of the airway cells.  
367 While the available evidence suggests that mucus plugs within the CF airway provide an anaerobic  
368 environment for bacterial growth, regions of aerobic growth cannot be excluded, especially during  
369 periods of biofilm dispersal. It is noteworthy that nitrite effectively prevented bacterial growth under  
370 both aerobic and anaerobic conditions.

371 The millimolar concentrations of nitrite we used in this study are much higher than typical  
372 concentrations of currently used antibiotics, which may cause concern regarding cytotoxicity. Yoon *et al*  
373 clearly demonstrated that nitrite concentrations up to 300 mM do not cause epithelial cytotoxicity as

374 measured by lactate dehydrogenase release, effect on short circuit current, permeability to dextran, or IL-  
375 8 secretion (17). In our studies, CFBE-wt cells tolerated up to 50mM nitrite without a loss of barrier  
376 function and well-differentiated primary CF HBE cells did not show loss of barrier integrity even with  
377 exposure to 300 mM sodium nitrite. Further, inhalation of approximately 1 molar sodium nitrite has  
378 been well tolerated by human subjects in phase I and II studies (M. Gladwin, personal communication).  
379 These data support the pursuit of clinical trials using nitrite as a nebulized antibiotic against *P.*  
380 *aeruginosa* in CF.

381 While our study investigated the interactions between colistimethate and nitrite, inhaled  
382 colistimethate is used less frequently than inhaled tobramycin and inhaled aztreonam in the CF  
383 population. Previous reports demonstrated that NO protects bacteria against a wide range of antibiotics  
384 (45). However, these reports do not address the interaction between NO and antimicrobial peptides  
385 such as the polymyxins, which have a unique mechanism of action. The possibility that nitrite may have  
386 adverse interactions with other antibiotics is a valid concern, warranting further investigation.

387 Despite widespread clinical use, the activity of colistimethate against biotic biofilms has not been  
388 clearly described. We have shown that colistin sulfate has activity against biotic biofilms that is at least  
389 comparable to that of ciprofloxacin. The activity of polymyxins under anaerobic conditions also has not  
390 been extensively studied. In the report by Hill et al, anaerobic growth was supported by Muller Hinton  
391 broth in the absence of exogenous nitrate, which makes the results difficult to interpret. Polymyxin  
392 susceptibility is also pH dependent. This study used pH 6.5, the reported pH of the CF airway surface  
393 liquid, thus the colistin sulfate MICs for these isolates may be slightly different in this study than when  
394 MIC testing is performed at pH 7.4. Additionally, ionic strength can affect polymyxin activity, and  
395 hypertonicity can cause additional effects on the epithelial cells used in our co-culture experiments (43).  
396 To account for this possibility, sodium chloride was used as a tonicity control in the static co-culture  
397 experiments.

398 The strengths of combining polymyxins with nitrite are the activity under anaerobic conditions  
399 and the activity against biotic biofilms, which are limitations of our current antibiotic approaches.

400 Additionally, the proposed mechanism of interaction is unique. Existing antibiotics do not target  
401 bacterial respiration, although the combination of fosfomycin and tobramycin has recently been shown to  
402 suppress denitrification (46). While the current study focused on the interaction of nitrite and  
403 polymyxins in aerobic metabolism, a similar effect is possible regarding anaerobic respiration where  
404 polymyxin induced inner membrane damage may indirectly disrupt the function of the denitrification  
405 enzymes allowing accumulation of toxic intermediates. Because of the rapidity of bacterial killing by  
406 polymyxins we did not directly test the hypothesis that polymyxins inhibit denitrification. However, the  
407 proposed mechanism that nitrite and polymyxins are both inhibiting aerobic respiration is concordant  
408 with the observation that flow cell biofilms are killed by the combination of colistin and the respiratory  
409 chain uncoupler CCCP (24). The advantage of our approach is that, unlike CCCP and other respiratory  
410 chain poisons, nitrite can be safely nebulized.

411 While the antimicrobial effects of nitrite in planktonic, aerated culture are NO-dependent,  
412 antimicrobial effects under biofilm growth conditions are likely not NO-dependent. In these experiments,  
413 the scavenger CPTIO was added while the biofilms were microcolonies with minimal matrix production,  
414 so inability of the scavenger to penetrate the colony is unlikely to be solely responsible for these results.  
415 There are several potential explanations for the difference in NO-radical dependence of growth inhibition  
416 by nitrite. First, *P. aeruginosa* has multiple mechanisms for detoxifying NO including expression of  
417 flavohemoglobins and the anaerobic expression catalase (47, 48). The relative efficiency of these  
418 detoxification systems, and thus organismal exposure to NO vs nitrite, may vary with growth conditions.  
419 Second, the targets of nitrosative stress are not clearly understood in *P. aeruginosa*, especially when the  
420 metabolic versatility of the bacterium is considered. Nitrite and NO can cause S-nitrosation of cysteine  
421 and the inactivation of Fe-S containing proteins. Targets of S-nitrosation have been identified in *Borrelia*  
422 *burgdorferi*, *Mycobacterium tuberculosis*, *Escherichia coli* and *Helicobacter pylori*, but to date not in *P.*  
423 *aeruginosa* (49-51). Multiple enzymes within central metabolism are potential targets for inactivation by  
424 nitrosative stress including NADH dehydrogenase, the terminal cytochrome c oxidases, and aconitase. In  
425 eukaryotes, mitochondrial complex I is a target for cysteine S-nitrosation, which confers protection from

426 ischemia/perfusion injury (52, 53). In contrast, work in *Salmonella enterica* suggested the site of  
427 respiratory inhibition by the NO donor spermine NONOate to be nitrosylation of *heme d* in the terminal  
428 cytochrome oxidases while bacterial NADH dehydrogenase activity remained uninhibited. The sources  
429 of nitrosative stress vary between these reports, and more importantly the role of NADH dehydrogenase  
430 in the organism vary (*S. enterica* is viable in the absence of both NADH dehydrogenases). Growth  
431 conditions may dictate the bacterial targets of nitrosative stress (and thus the chemical targets for nitrite  
432 or NO). The study by Ren *et al* is informative. *E. coli* growth in minimal media requires synthesis of  
433 branched chain amino acids catalyzed by dihydroxyacid dehydratase (IlvD). NO inhibits IlvD through  
434 formation of dinitrosyl iron complexes, thus inhibiting growth and rendering the bacteria dependent on  
435 supplementation of branched chain amino acids. Growth inhibition by NO in this situation is avoided by  
436 supplementing the growth media with the needed amino acids (54). One could imagine that had the  
437 experiment performed in *E. coli* been done in rich media, a different target of nitrosative stress might  
438 have been found (albeit with a higher stress required)(55). In the current study, the bacterial substrate  
439 usage in aerated LB is likely very different from that of a low-oxygen tension biofilm grown in apposition  
440 to an epithelial cell, which may then in turn dictate which metabolic pathways are susceptible to  
441 inhibition. Teasing out the targets of NO vs nitrite under biofilm conditions as compared to planktonic  
442 growth will be a complex task.

443 In conclusion, nitrite shows promise as an antimicrobial agent targeting biotic biofilms in the  
444 lungs of patients with *P. aeruginosa* infection. Combining nitrite with colistimethate may increase the  
445 effectiveness of the latter. Even in isolation, inhaled nitrite may be a useful addition to our antimicrobial  
446 armamentarium because of its broad range of activity, including activity against anaerobically growing *P.*  
447 *aeruginosa*, anti-biofilm activity, and activity against other pathogens such as *Achromobacter sp.* and  
448 *Burkholderia sp.* for which few effective antimicrobials are available. This study provides further  
449 motivation to pursue human trials of nebulized nitrite as an antimicrobial in patients with airway  
450 colonization by resistant organisms.

452  
453  
454  
455  
456  
457  
458  
459  
460  
461  
462  
463  
464  
465  
466  
467  
468  
469  
470  
471  
472  
473  
474  
475  
476  
477  
478  
479  
480  
481  
482  
483  
484  
485  
486  
487  
488  
489  
490  
491  
492  
493  
494  
495

**Acknowledgments:** The authors would like to thank Lauren Lashua, Stefanie Brown, and Catherine Corey for technical assistance. Strains kindly provided by Dr. John LiPuma (*B. cepacia* Research Laboratory and Repository; supported by the Cystic Fibrosis Foundation).

### WORKS CITED

1. Schaible B, Taylor CT, Schaffer K. Hypoxia increases antibiotic resistance in *Pseudomonas aeruginosa* through altering the composition of multidrug efflux pumps. *Antimicrob Agents Chemother* 2012;56:2114-2118.
2. Mah TF, Pitts B, Pellock B, Walker GC, Stewart PS, O'Toole GA. A genetic basis for *Pseudomonas aeruginosa* biofilm antibiotic resistance. *Nature* 2003;426:306-310.
3. Callaghan M, McClean S. Bacterial host interactions in cystic fibrosis. *Curr Opin Microbiol* 2012;15:71-77.
4. Yoon SS, Hennigan RF, Hilliard GM, Ochsner UA, Parvatiyar K, Kamani MC, Allen HL, DeKievit TR, Gardner PR, Schwab U, Rowe JJ, Iglewski BH, McDermott TR, Mason RP, Wozniak DJ, Hancock RE, Parsek MR, Noah TL, Boucher RC, Hassett DJ. *Pseudomonas aeruginosa* anaerobic respiration in biofilms: Relationships to cystic fibrosis pathogenesis. *Dev Cell* 2002;3:593-603.
5. Kolpen M, Kuhl M, Bjarnsholt T, Moser C, Hansen CR, Liengard L, Kharazmi A, Pressler T, Hoiby N, Jensen PO. Nitrous oxide production in sputum from cystic fibrosis patients with chronic *Pseudomonas aeruginosa* lung infection. *PLoS One* 2014;9:e84353.
6. Hill D, Rose B, Pajkos A, Robinson M, Bye P, Bell S, Elkins M, Thompson B, Macleod C, Aaron SD, Harbour C. Antibiotic susceptibilities of *Pseudomonas aeruginosa* isolates derived from patients with cystic fibrosis under aerobic, anaerobic, and biofilm conditions. *J Clin Microbiol* 2005;43:5085-5090.
7. Dykhuizen RS, Fraser A, McKenzie H, Golden M, Leifert C, Benjamin N. *Helicobacter pylori* is killed by nitrite under acidic conditions. *Gut* 1998;42:334-337.
8. Cunningham R, Mustoe E, Spiller L, Lewis S, Benjamin N. Acidified nitrite: A host defence against colonization with *C. difficile* spores? *J Hosp Infect* 2014;86:155-157.
9. Husain M, Bourret TJ, McCollister BD, Jones-Carson J, Laughlin J, Vazquez-Torres A. Nitric oxide evokes an adaptive response to oxidative stress by arresting respiration. *J Biol Chem* 2008;283:7682-7689.
10. Reddy D, Lancaster JR, Jr., Cornforth DP. Nitrite inhibition of *Clostridium botulinum*: Electron spin resonance detection of iron-nitric oxide complexes. *Science* 1983;221:769-770.
11. Rowe JJ, Yarborough JM, Rake JB, Eagon RG. Nitrite inhibition of aerobic bacteria. *Current Microbiology* 1979;2:51-54.
12. Kim-Shapiro DB, Gladwin MT. Mechanisms of nitrite bioactivation. *Nitric Oxide* 2013.
13. Bueno M, Wang J, Mora AL, Gladwin MT. Nitrite signaling in pulmonary hypertension: Mechanisms of bioactivation, signaling, and therapeutics. *Antioxid Redox Signal* 2013;18:1797-1809.
14. Miller C, McMullin B, Ghaffari A, Stenzler A, Pick N, Roscoe D, Ghahary A, Road J, Av-Gay Y. Gaseous nitric oxide bactericidal activity retained during intermittent high-dose short duration exposure. *Nitric Oxide* 2009;20:16-23.
15. Miller C, Miller M, McMullin B, Regev G, Serghides L, Kain K, Road J, Av-Gay Y. A phase i clinical study of inhaled nitric oxide in healthy adults. *J Cyst Fibros* 2012;11:324-331.

- 496 16. Hon YY, Sun H, Dejam A, Gladwin MT. Characterization of erythrocytic uptake and release and  
497 disposition pathways of nitrite, nitrate, methemoglobin, and iron-nitrosyl hemoglobin in the human  
498 circulation. *Drug Metab Dispos* 2010;38:1707-1713.
- 499 17. Yoon SS, Coakley R, Lau GW, Lyman SV, Gaston B, Karabulut AC, Hennigan RF, Hwang SH, Buettner  
500 G, Schurr MJ, Mortensen JE, Burns JL, Speert D, Boucher RC, Hassett DJ. Anaerobic killing of mucoid  
501 *Pseudomonas aeruginosa* by acidified nitrite derivatives under cystic fibrosis airway conditions. *J Clin*  
502 *Invest* 2006;116:436-446.
- 503 18. Yang T. Mechanism of nitrite inhibition of cellular respiration in *Pseudomonas aeruginosa*. *Current*  
504 *Microbiology* 1985;12:35-40.
- 505 19. Reszka KJ, Xiong Y, Sallans L, Pasula R, Olakanmi O, Hassett DJ, Britigan BE. Inactivation of the  
506 potent *Pseudomonas aeruginosa* cytotoxin pyocyanin by airway peroxidases and nitrite. *Am J Physiol Lung*  
507 *Cell Mol Physiol* 2012;302:L1044-1056.
- 508 20. Wood SR, Firoved AM, Ornatowski W, Mai T, Deretic V, Timmins GS. Nitrosative stress inhibits  
509 production of the virulence factor alginate in mucoid *Pseudomonas aeruginosa*. *Free Radic Res*  
510 2007;41:208-215.
- 511 21. Major TA, Panmanee W, Mortensen JE, Gray LD, Hoglen N, Hassett DJ. Sodium nitrite-mediated  
512 killing of the major cystic fibrosis pathogens *Pseudomonas aeruginosa*, *Staphylococcus aureus*, and  
513 *Burkholderia cepacia* under anaerobic planktonic and biofilm conditions. *Antimicrob Agents*  
514 *Chemother*;54:4671-4677.
- 515 22. Schlag S, Nerz C, Birkenstock TA, Altenberend F, Gotz F. Inhibition of staphylococcal biofilm  
516 formation by nitrite. *J Bacteriol* 2007;189:7911-7919.
- 517 23. Braun C, Zumft WG. Marker exchange of the structural genes for nitric oxide reductase blocks the  
518 denitrification pathway of *Pseudomonas stutzeri* at nitric oxide. *J Biol Chem* 1991;266:22785-22788.
- 519 24. Pamp SJ, Gjermansen M, Johansen HK, Tolker-Nielsen T. Tolerance to the antimicrobial peptide  
520 colistin in *Pseudomonas aeruginosa* biofilms is linked to metabolically active cells, and depends on the  
521 pmr and mexab-oprm genes. *Mol Microbiol* 2008;68:223-240.
- 522 25. Chiang WC, Pamp SJ, Nilsson M, Givskov M, Tolker-Nielsen T. The metabolically active  
523 subpopulation in *Pseudomonas aeruginosa* biofilms survives exposure to membrane-targeting  
524 antimicrobials via distinct molecular mechanisms. *FEMS Immunol Med Microbiol* 2012;65:245-256.
- 525 26. LaPorte DC, Rosenthal KS, Storm DR. Inhibition of *Escherichia coli* growth and respiration by  
526 polymyxin b covalently attached to agarose beads. *Biochemistry* 1977;16:1642-1648.
- 527 27. Haworth CS, Foweraker JE, Wilkinson P, Kenyon RF, Bilton D. Inhaled colistin in patients with  
528 bronchiectasis and chronic *Pseudomonas aeruginosa* infection. *Am J Respir Crit Care Med* 2014;189:975-  
529 982.
- 530 28. CFF. Patient registry: Annual data report. 2012.
- 531 29. Moskowitz SM, Silva SJ, Mayer-Hamblett N, Pasta DJ, Mink DR, Mabie JA, Konstan MW, Wagener JS.  
532 Shifting patterns of inhaled antibiotic use in cystic fibrosis. *Pediatr Pulmonol* 2008;43:874-881.
- 533 30. Schuster A, Haliburn C, Doring G, Goldman MH. Safety, efficacy and convenience of colistimethate  
534 sodium dry powder for inhalation (colobreathe dpi) in patients with cystic fibrosis: A randomised study.  
535 *Thorax* 2013;68:344-350.
- 536 31. Moreau-Marquis S, Bomberger JM, Anderson GG, Swiatecka-Urban A, Ye S, O'Toole GA, Stanton BA.  
537 The deltaf508-cftr mutation results in increased biofilm formation by *Pseudomonas aeruginosa* by  
538 increasing iron availability. *Am J Physiol Lung Cell Mol Physiol* 2008;295:L25-37.
- 539 32. Smith EE, Buckley DG, Wu Z, Saenphimmachak C, Hoffman LR, D'Argenio DA, Miller SI, Ramsey  
540 BW, Speert DP, Moskowitz SM, Burns JL, Kaul R, Olson MV. Genetic adaptation by *Pseudomonas*  
541 *aeruginosa* to the airways of cystic fibrosis patients. *Proc Natl Acad Sci U S A* 2006;103:8487-8492.
- 542 33. Spilker T, Vandamme P, Lipuma JJ. A multilocus sequence typing scheme implies population  
543 structure and reveals several putative novel Achromobacter species. *J Clin Microbiol* 2012;50:3010-3015.
- 544 34. Miller AK, Brannon MK, Stevens L, Johansen HK, Selgrade SE, Miller SI, Hoiby N, Moskowitz SM.  
545 Phoq mutations promote lipid a modification and polymyxin resistance of *Pseudomonas aeruginosa* found  
546 in colistin-treated cystic fibrosis patients. *Antimicrob Agents Chemother* 2011;55:5761-5769.



- 547 35. Heydorn A, Nielsen AT, Hentzer M, Sternberg C, Givskov M, Ersboll BK, Molin S. Quantification of  
548 biofilm structures by the novel computer program comstat. *Microbiology* 2000;146 ( Pt 10):2395-2407.
- 549 36. Moreau-Marquis S, Redelman CV, Stanton BA, Anderson GG. Co-culture models of *Pseudomonas*  
550 *aeruginosa* biofilms grown on live human airway cells. *J Vis Exp* 2010.
- 551 37. Rasgado-Flores H, Krishna Mandava V, Siman H, Van Driessche W, Pilewski JM, Randell SH, Bridges  
552 RJ. Effect of apical hyperosmotic sodium challenge and amiloride on sodium transport in human  
553 bronchial epithelial cells from cystic fibrosis donors. *Am J Physiol Cell Physiol* 2013;305:C1114-1122.
- 554 38. Wiegand I, Hilpert K, Hancock RE. Agar and broth dilution methods to determine the minimal  
555 inhibitory concentration (mic) of antimicrobial substances. *Nat Protoc* 2008;3:163-175.
- 556 39. Ratjen F, Rietschel E, Kasel D, Schwiertz R, Starke K, Beier H, van Koningsbruggen S, Grasemann H.  
557 Pharmacokinetics of inhaled colistin in patients with cystic fibrosis. *J Antimicrob Chemother* 2006;57:306-  
558 311.
- 559 40. S WSY, Li J, Patel K, Wilson JW, Dooley MJ, George J, Clark D, Poole S, Williams E, Porter CJ, Nation  
560 RL, McIntosh MP. Pulmonary and systemic pharmacokinetics of inhaled and intravenous colistin  
561 methanesulfonate in cystic fibrosis patients: Targeting advantage of inhalational administration.  
562 *Antimicrob Agents Chemother* 2014;58:2570-2579.
- 563 41. Williams DR, Rowe JJ, Romero P, Eagon RG. Denitrifying *Pseudomonas aeruginosa*: Some  
564 parameters of growth and active transport. *Appl Environ Microbiol* 1978;36:257-263.
- 565 42. Hernandez DD, F.M., Rowe J.J.; . Nitrate transport and its regulation by O<sub>2</sub> in *Pseudomonas*  
566 *aeruginosa*. *Archives of Biochemistry and Biophysics* 1991;286:159-163.
- 567 43. Daugelavicius R, Bakiene E, Bamford DH. Stages of polymyxin b interaction with the *Escherichia*  
568 *coli* cell envelope. *Antimicrob Agents Chemother* 2000;44:2969-2978.
- 569 44. Champlin FR, Ellison ML, Bullard JW, Conrad RS. Effect of outer membrane permeabilisation on  
570 intrinsic resistance to low triclosan levels in *Pseudomonas aeruginosa*. *Int J Antimicrob Agents*  
571 2005;26:159-164.
- 572 45. Gusarov I, Shatalin K, Starodubtseva M, Nudler E. Endogenous nitric oxide protects bacteria  
573 against a wide spectrum of antibiotics. *Science* 2009;325:1380-1384.
- 574 46. McCaughey G, Gilpin DF, Schneiders T, Hoffman LR, McKevitt M, Elborn JS, Tunney MM.  
575 Fosfomycin and tobramycin in combination downregulate nitrate reductase genes narG and narH,  
576 resulting in increased activity against *Pseudomonas aeruginosa* under anaerobic conditions. *Antimicrob*  
577 *Agents Chemother* 2013;57:5406-5414.
- 578 47. Yoon SS, Karabulut AC, Lipscomb JD, Hennigan RF, Lyman SV, Groce SL, Herr AB, Howell ML, Kiley  
579 PJ, Schurr MJ, Gaston B, Choi KH, Schweizer HP, Hassett DJ. Two-pronged survival strategy for the major  
580 cystic fibrosis pathogen, *Pseudomonas aeruginosa*, lacking the capacity to degrade nitric oxide during  
581 anaerobic respiration. *EMBO J* 2007;26:3662-3672.
- 582 48. Su S, Panmanee W, Wilson JJ, Mahtani HK, Li Q, Vanderwielen BD, Makris TM, Rogers M, McDaniel  
583 C, Lipscomb JD, Irvin RT, Schurr MJ, Lancaster JR, Jr., Kovall RA, Hassett DJ. Catalase (kata) plays a role in  
584 protection against anaerobic nitric oxide in *Pseudomonas aeruginosa*. *PLoS One* 2014;9:e91813.
- 585 49. Qu W, Zhou Y, Sun Y, Fang M, Yu H, Li W, Liu Z, Zeng J, Chen C, Gao C, Jia J. Identification of s-  
586 nitrosylation of proteins of *Helicobacter pylori* in response to nitric oxide stress. *J Microbiol* 2011;49:251-  
587 256.
- 588 50. Rhee KY, Erdjument-Bromage H, Tempst P, Nathan CF. S-nitroso proteome of *Mycobacterium*  
589 *tuberculosis*: Enzymes of intermediary metabolism and antioxidant defense. *Proc Natl Acad Sci U S A*  
590 2005;102:467-472.
- 591 51. Bourret TJ, Boylan JA, Lawrence KA, Gherardini FC. Nitrosative damage to free and zinc-bound  
592 cysteine thiols underlies nitric oxide toxicity in wild-type *borrelia burgdorferi*. *Mol Microbiol*  
593 2011;81:259-273.
- 594 52. Chouchani ET, Methner C, Nadtochiy SM, Logan A, Pell VR, Ding S, James AM, Cocheme HM,  
595 Reinhold J, Lilley KS, Partridge L, Fearnley IM, Robinson AJ, Hartley RC, Smith RA, Krieg T, Brookes PS,  
596 Murphy MP. Cardioprotection by s-nitrosation of a cysteine switch on mitochondrial complex I. *Nat Med*  
597 2013;19:753-759.

- 598 53. Shiva S, Sack MN, Greer JJ, Duranski M, Ringwood LA, Burwell L, Wang X, MacArthur PH, Shoja A,  
599 Raghavachari N, Calvert JW, Brookes PS, Lefer DJ, Gladwin MT. Nitrite augments tolerance to  
600 ischemia/reperfusion injury via the modulation of mitochondrial electron transfer. *J Exp Med*  
601 2007;204:2089-2102.
- 602 54. Ren B, Zhang N, Yang J, Ding H. Nitric oxide-induced bacteriostasis and modification of iron-  
603 sulphur proteins in *Escherichia coli*. *Mol Microbiol* 2008;70:953-964.
- 604 55. Bowman LA, McLean S, Poole RK, Fukuto JM. The diversity of microbial responses to nitric oxide  
605 and agents of nitrosative stress close cousins but not identical twins. *Adv Microb Physiol* 2011;59:135-  
606 219.

612 **Figure 1: Nitrite prevents *P. aeruginosa* biofilm formation on airway epithelial cells.** To test if  
613 nitrite prevented biotic biofilm formation, *Pseudomonas aeruginosa* biofilms were grown on CFBE-wt  
614 cells seeded onto coverslips and imaged by live cell microscopy after 6 hours of growth. DAPI (blue)  
615 staining shows the epithelial cell nuclei. (A) Untreated biofilms showed abundant growth of (GFP)-*P.*  
616 *aeruginosa* in characteristic clusters. (B) Biofilms treated with 15mM showed very few bacteria present.  
617 Volumetric projections of control (C) vs 15 mM (D) treated biofilms demonstrate the decreased bacterial  
618 biomass with 15 mM nitrite exposure. COMSTAT biomass quantification showed an 80% reduction in  
619 biomass (numbers on panels). (E) A static co-culture model was used to establish a dose-response  
620 relationship for nitrite in biofilm prevention. Increasing concentrations of sodium nitrite were added to  
621 epithelial – *P. aeruginosa* co-cultures following an attachment period. Bacterial colony forming units  
622 (CFU) were counted 5 hours later. All concentrations caused a statistically significant decrease in bacteria  
623 (one-way ANOVA followed by Tukey test). (F) Transepithelial electrical resistance measurements were  
624 used to assess epithelial integrity in the presence of nitrite. Resistance was not significantly different  
625 from control at 15mM and 50 mM nitrite (one-way ANOVA followed by Tukey test,  $p > 0.05$ ).

627 **Figure 2: Nitrite sensitizes *P. aeruginosa* to polymyxins.** (A) The static co-culture model was used to  
628 determine the efficacy of colistin sulfate at disrupting established *P. aeruginosa* biotic biofilms. *P.*  
629 *aeruginosa* was added to the apical surface of CFBE-wt cells. After 6 hours of maturation, the biofilms  
630 were treated with colistin sulfate for 90 minutes and the number of bacteria was enumerated with a CFU  
631 dilution assay. 20 $\mu$ g/ml colistin sulfate caused a 3-log reduction in CFUs. Planktonic time-kill assays  
632 were used to determine the interaction between nitrite and polymyxins. Subinhibitory concentrations of  
633 (B) colistin sulfate (1.5 $\mu$ g/ml) and (C) colistimethate (70 $\mu$ g/ml) showed increased antimicrobial activity  
634 against *P. aeruginosa* strain PA14 when combined with subinhibitory concentrations of acidified sodium  
635 nitrite.  $p < 0.05$  for polymyxin vs polymyxin + nitrite by two-way ANOVA. (D) Representative cultures  
636 showed reduced bacterial growth (turbidity) when both CMS and nitrite are present.

638 **Table 1:** Checkerboard MIC testing under aerobic and anaerobic conditions for 12 isolates of *P.*  
639 *aeruginosa*. MIC was determined by agar dilution with pH 6.5 MHB agar. 1% KNO<sub>3</sub> was added for  
640 anaerobic growth and anaerobic plates were incubated for 48 hours. Three isolates (33-2, 66-2, and 74-  
641 2) grew too poorly under anaerobic conditions to obtain interpretable MICs. The MIC for both colistin  
642 sulfate and nitrite are lower under anaerobic conditions. Nitrite and colistin sulfate were synergistic for  
643 one strain (PA14) under anaerobic conditions (FIC<0.5).

644  
645 **Figure 3: Nitrite and colistimethate additively prevent biotic biofilm formation on primary CF**  
646 **human airway epithelial cells.** PAO1 biofilms were grown on primary CF HBE cells. After attachment,  
647 developing biofilms were treated with 300mM nitrite, colistimethate 20µg/ml or a combination of the  
648 agents. p-values indicated from two-way ANOVA.

649  
650 **Figure 4: Increased bacterial killing with nitrite and polymyxins is not due to increased**  
651 **intracellular availability of nitrite.** (A) Bacteria were grown in the presence of 15 mM nitrite for 5.5  
652 hours, rinsed and exposed to colistimethate in liquid aerobic culture for 60 minutes. Nitrite pretreatment  
653 sensitized *P. aeruginosa* to colistimethate in planktonic culture. (B) Planktonic cultures were exposed to  
654 polymyxin b (PMB), polymyxin b nonapeptide (PMBN) and 12 mM nitrite for 5.5 hours. No significant  
655 difference was seen by one-way ANOVA between PMBN treatment with or without nitrite. PMB + nitrite  
656 was significantly lower than PMB or nitrite alone by one-way ANOVA followed by Tukey test.

657  
658 **Figure 5: Inhibition of respiration by nitrite and polymyxins** A) Inhibiting respiration with 0.4mM  
659 KCN or 5mM NaN<sub>3</sub> increases polymyxin susceptibility of *P. aeruginosa* grown in aerobic LB culture.  
660 Colistin sulfate (COL) was used at 1.5µg/ml while colistimethate (CMS) was used at 20µg/ml (both sub  
661 inhibitory doses in PA14 under these conditions). (B) Representative tracings of bacterial oxygen  
662 consumption measured using a Clark-type electrode in LB with increasing concentrations of nitrite. (C)  
663 At low concentrations, both nitrite and CMS inhibit oxygen consumption by 20%. The combination of

664 CMS and nitrite additively blocked oxygen uptake. Brackets show p values <0.05 from one-way ANOVA  
665 followed by Tukey test. Data shown as mean +/- SD. (D) Increased killing by nitrite and CMS in  
666 combination is not blocked by the addition of the scavenger CPTIO in planktonic culture. (E)  
667 Representative tracing of oxygen uptake from a Clark-type electrode. 15mM nitrite decreases oxygen  
668 consumption by 50%. Pretreatment with 1mM CPTIO or 15µM hemoglobin did not prevent nitrite  
669 induced oxygen consumption blockade.

670  
671 **Figure 6: Biofilm cytoostasis is nitric oxide independent.** (A) Nitrite inhibited growth of PA14 in  
672 planktonic culture. (B) To confirm that nitrite induced cytoostasis in planktonic cultures is nitric oxide  
673 dependent, log-phase oxygenated cultures were grown with nitrite and the nitric oxide scavengers CPTIO  
674 or oxyhemoglobin. Growth inhibition was blocked by the addition of either agent. (C) To determine if the  
675 prevention of biofilm growth by nitrite requires nitric oxide, static epithelial- *P. aeruginosa* co-cultures  
676 were treated with nitrite and the nitric oxide scavenger CPTIO. Growth inhibition was unchanged by the  
677 addition of 1mM CPTIO.

678  
679 **Supplementary Table 1:** The MIC for colistin sulfate was determined by agar dilution in the presence or  
680 absence of 3mM nitrite for 8 *Achromobacter sp.* isolates.

681

682

Table 1.

| Strain | Aerobic<br>MIC COL<br>µg/ml | Anaerobic<br>MIC COL<br>µg/ml | Aerobic<br>MIC mM<br>Nitrite | Anaerobic<br>MIC mM<br>Nitrite | Aerobic<br>FIC | Anaerobic<br>FIC |
|--------|-----------------------------|-------------------------------|------------------------------|--------------------------------|----------------|------------------|
| PA14   | 2                           | 2                             | 16                           | 4                              | 0.75           | 0.375            |
| PAO1   | 2                           | 1                             | 16                           | 4                              | 0.75           | 0.75             |
| 31-2   | 2                           | 0.5                           | 16                           | 4                              | 0.75           | 0.75             |
| 36-3   | 2                           | 0.5                           | 16                           | 4                              | 0.75           | 0.75             |
| 41-2   | 4                           | 0.5                           | 8                            | 4                              | 1.5            | 0.625            |
| 47-3   | 1                           | 0.25                          | 8                            | 2                              | 1              | 1                |
| 60-3   | 4                           | 1                             | 16                           | 4                              | 0.625          | 0.75             |
| 62-3   | 1                           | 0.25                          | 8                            | 4                              | 1              | 1                |
| 71-2   | 4                           | 1                             | 16                           | 4                              | 0.625          | 0.75             |
| 33-2   | 4                           | n.d.                          | 16                           | n.d.                           | 0.75           | n.d.             |
| 66-2   | 8                           | n.d.                          | 8                            | n.d.                           | 0.625          | n.d.             |
| 74-2   | 0.5                         | n.d.                          | 8                            | n.d.                           | 1              | n.d.             |

# Supplementary Table 1: Nitrite decreases the colistin sulfate MIC of *Achromobacter* isolates.

| Isolate # |                        | COL MIC ug/ml | COL MIC with 3mM nitrite |
|-----------|------------------------|---------------|--------------------------|
| AU19487   | <i>A. xylosoxidans</i> | 8             | 2                        |
| AU13697   | <i>A. ruhlandii</i>    | >512          | >512                     |
| AU2687a   | <i>A. xylosoxidans</i> | >512          | >512                     |
| AU18049   | <i>A. xylosoxidans</i> | 128           | 128                      |
| AU12168   | <i>A. xylosoxidans</i> | 128           | 32                       |
| AU12688   | <i>A. xylosoxidans</i> | 4             | 2                        |
| AU20153   | <i>A. dolans</i>       | 256           | 256                      |
| AU19839   | <i>A. xylosoxidans</i> | 256           | 128                      |

Table 1: The MIC for colistin sulfate was determined by agar dilution in the presence or absence of 3mM nitrite for 8 *Achromobacter sp.* isolates.

Figure 1  
[Click here to download high resolution image](#)

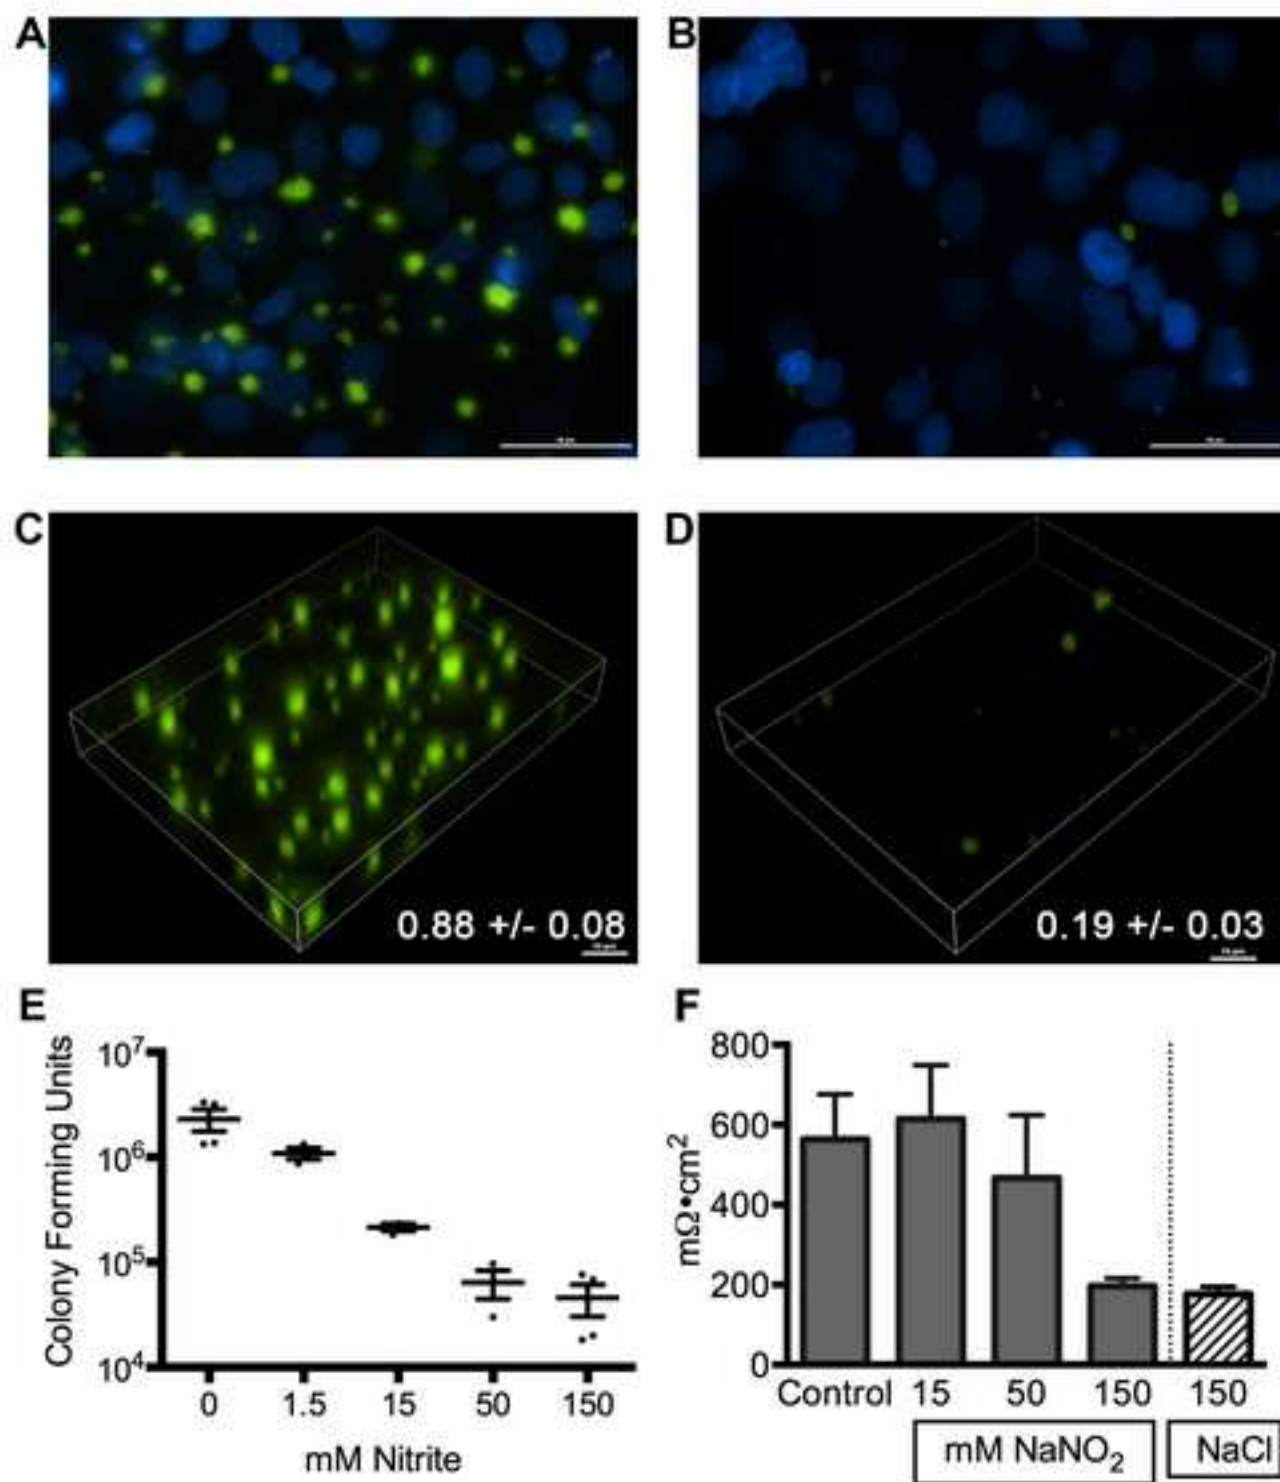



Figure 2  
[Click here to download high resolution image](#)

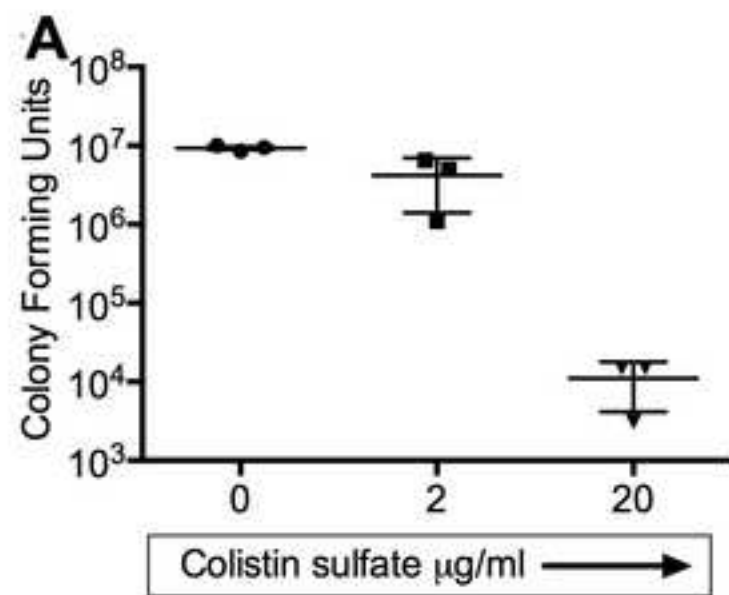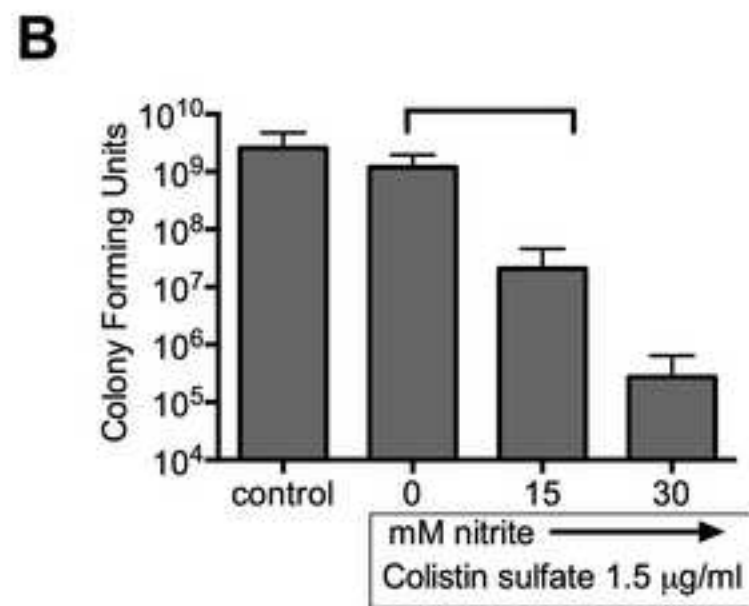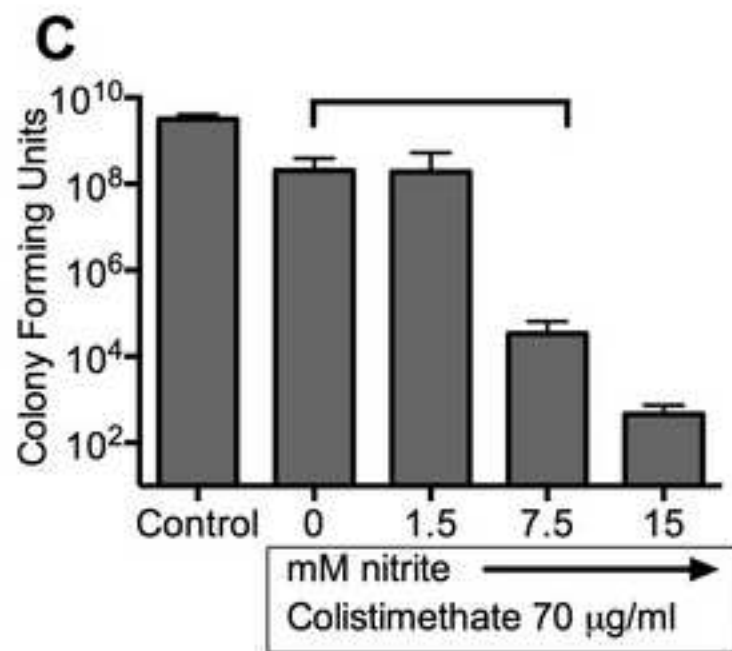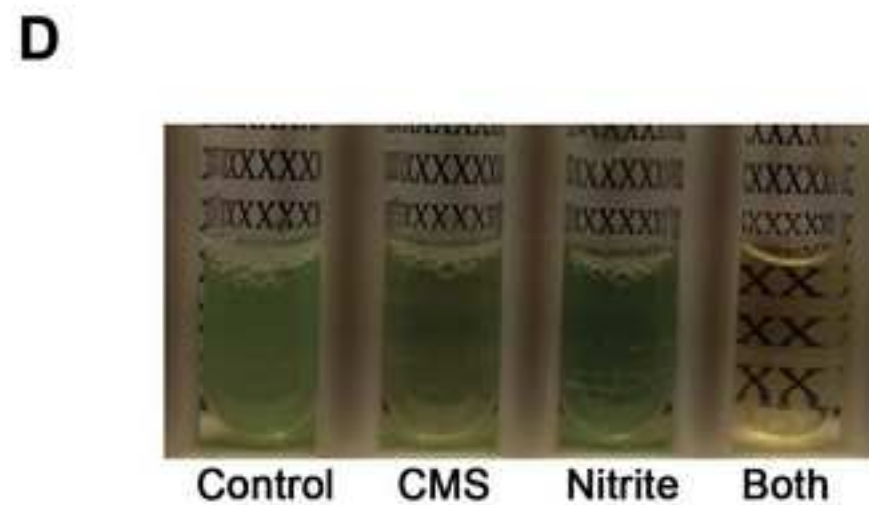

Figure 3  
[Click here to download high resolution image](#)

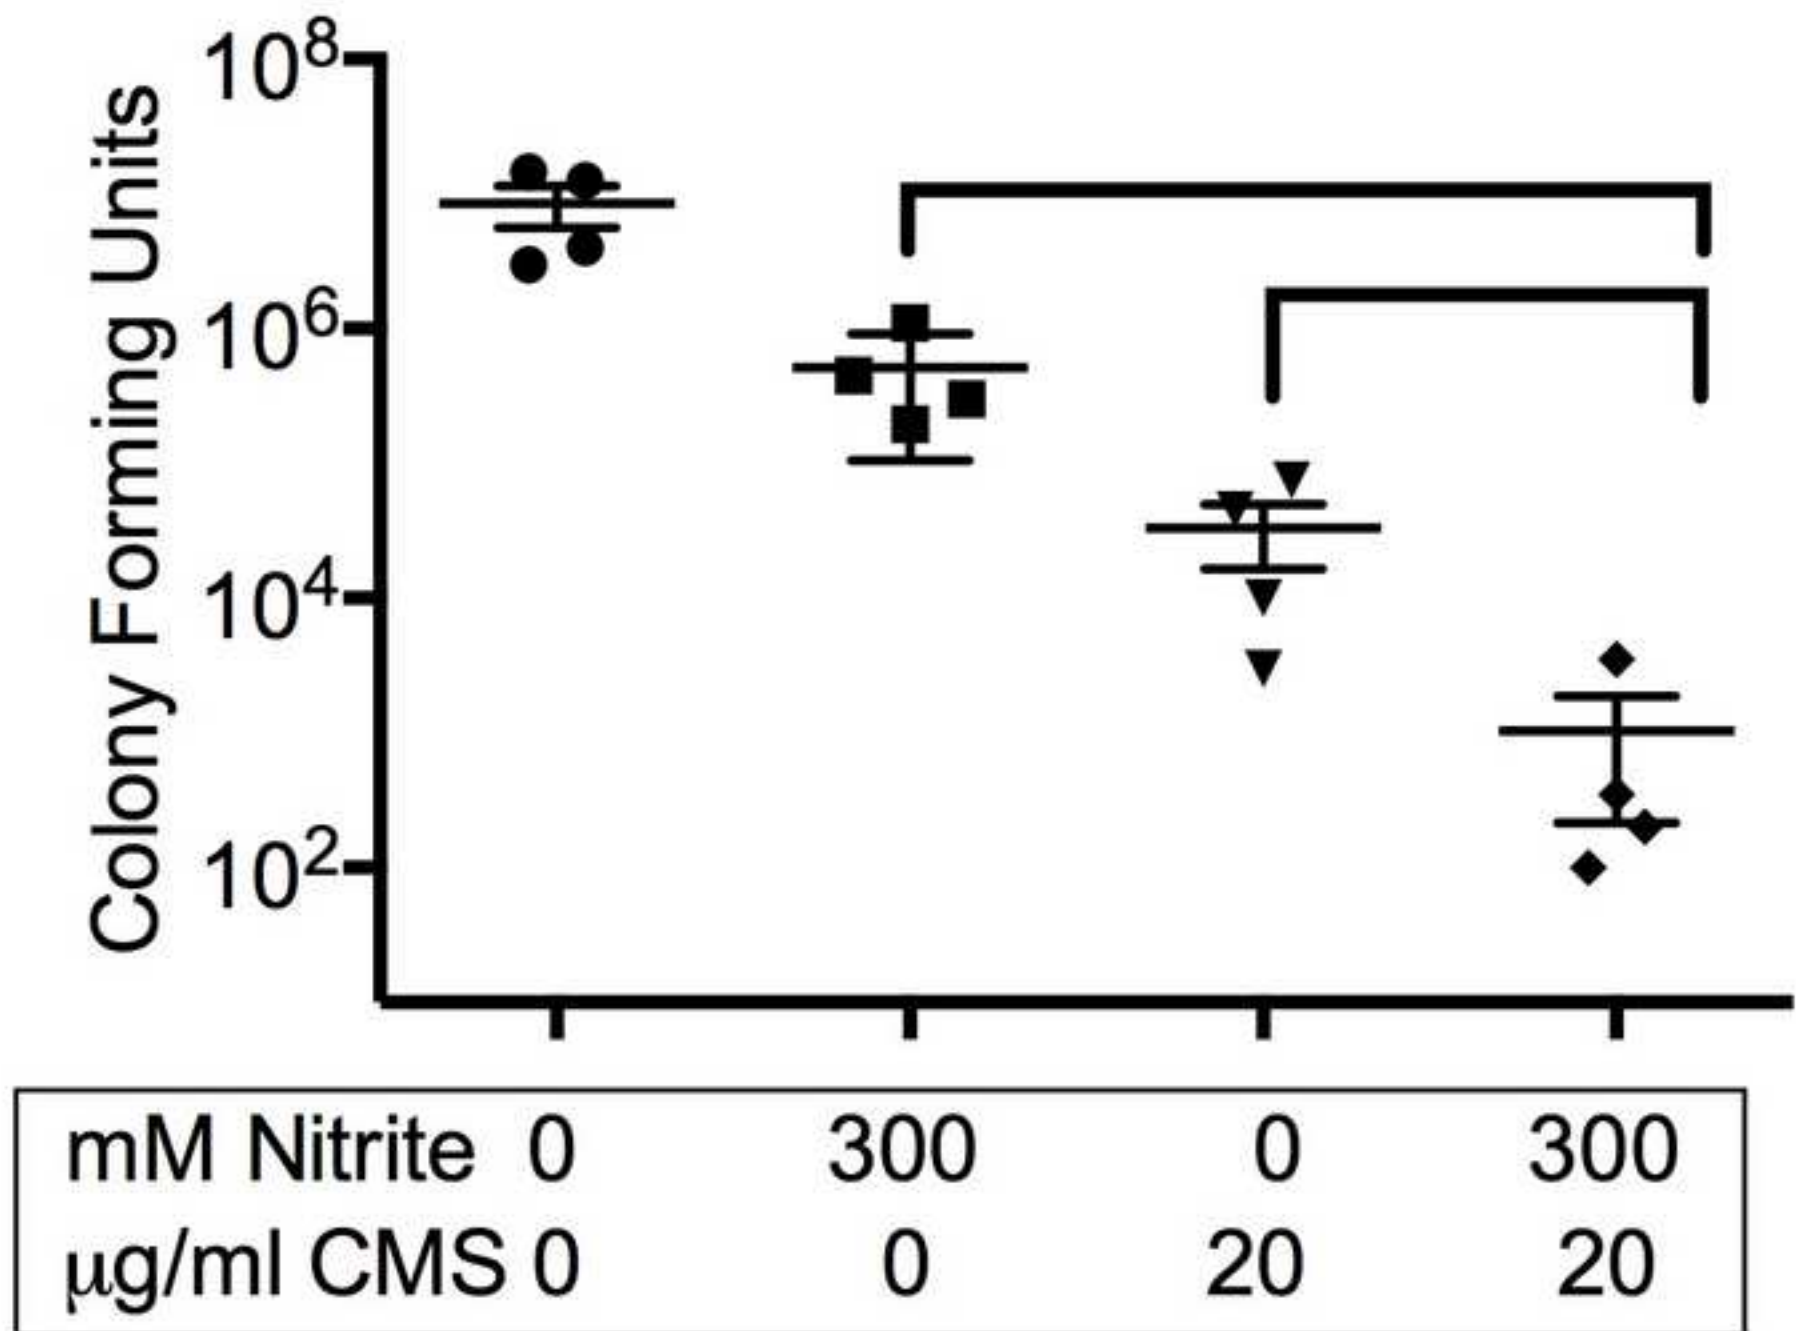

Figure 4  
[Click here to download high resolution image](#)

**A**

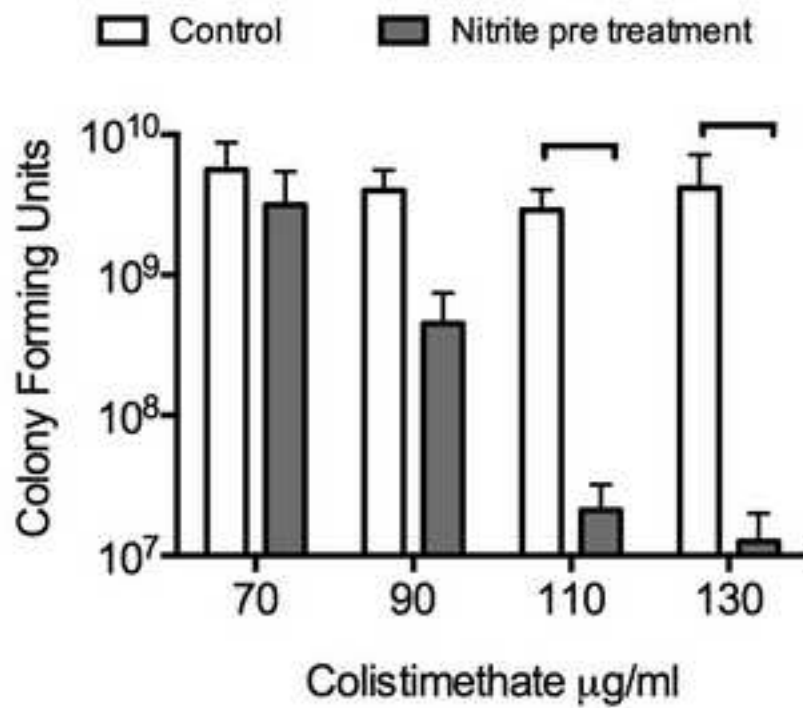

**B**

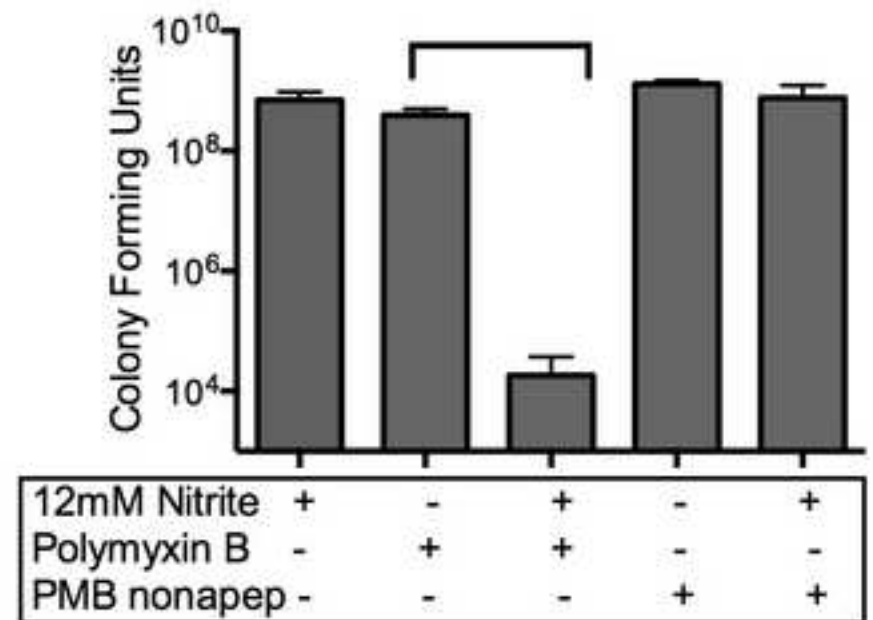

**Figure 5**  
[Click here to download high resolution image](#)

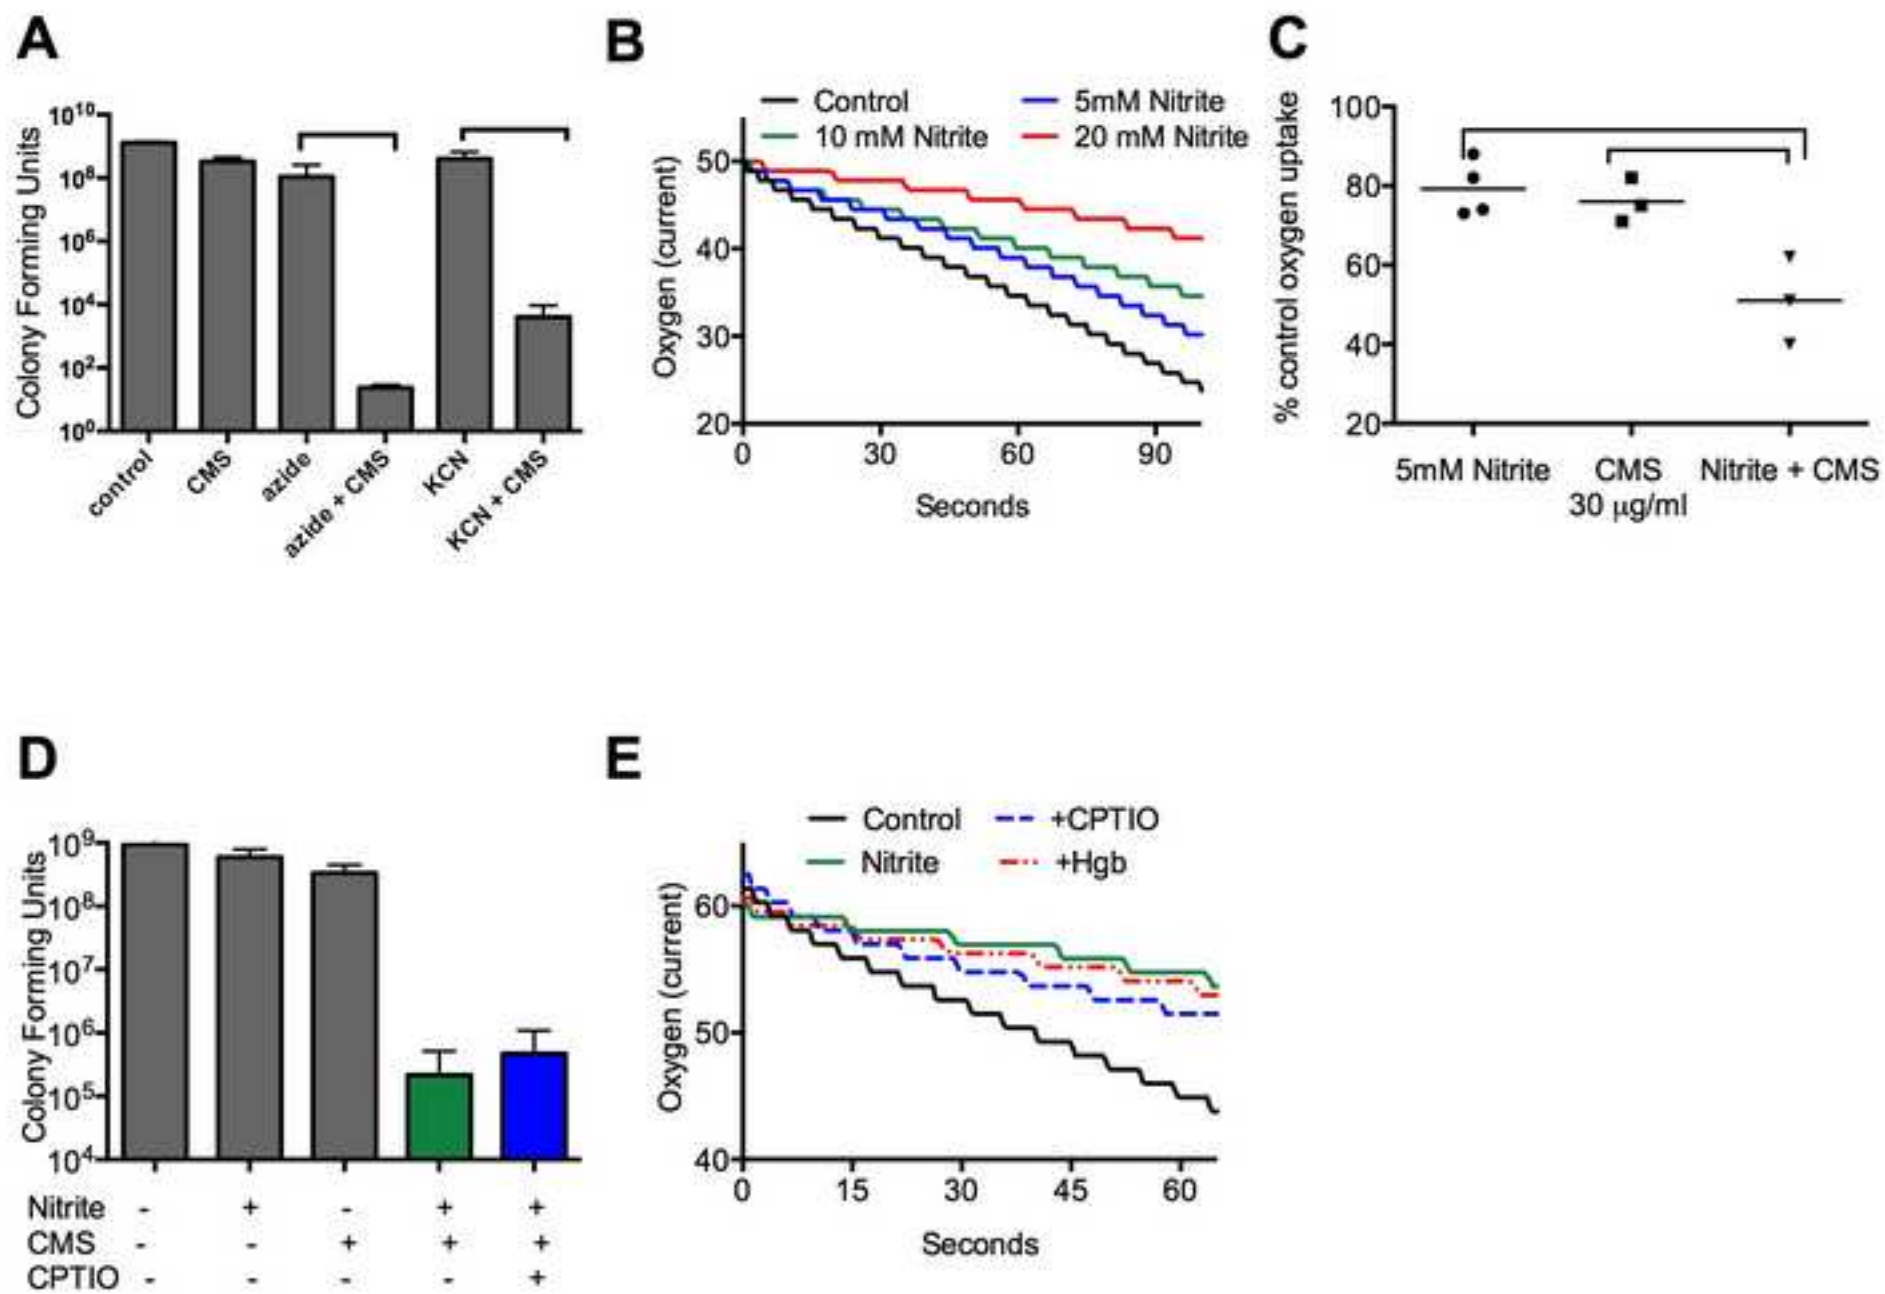

Figure 6  
[Click here to download high resolution image](#)

**A**

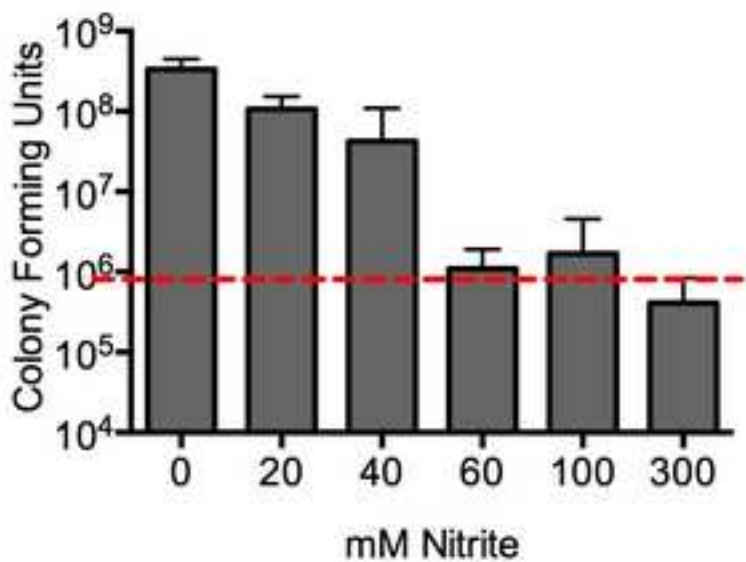

**B**

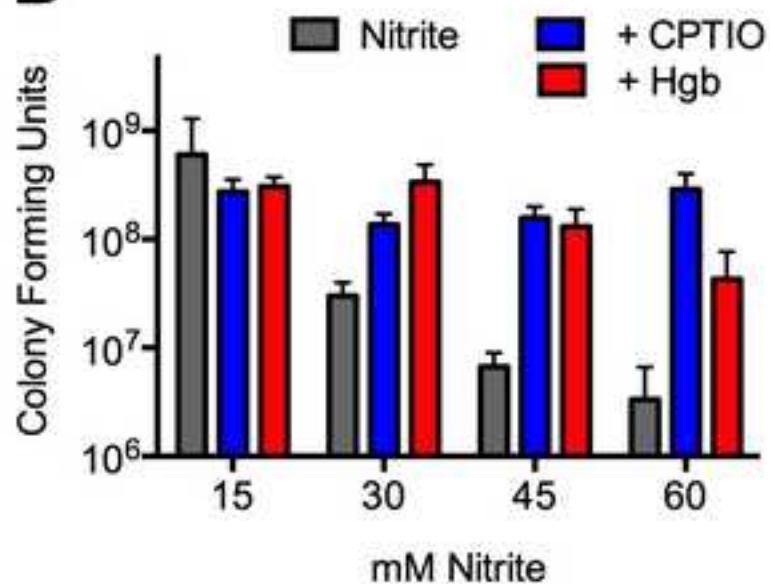

**C**

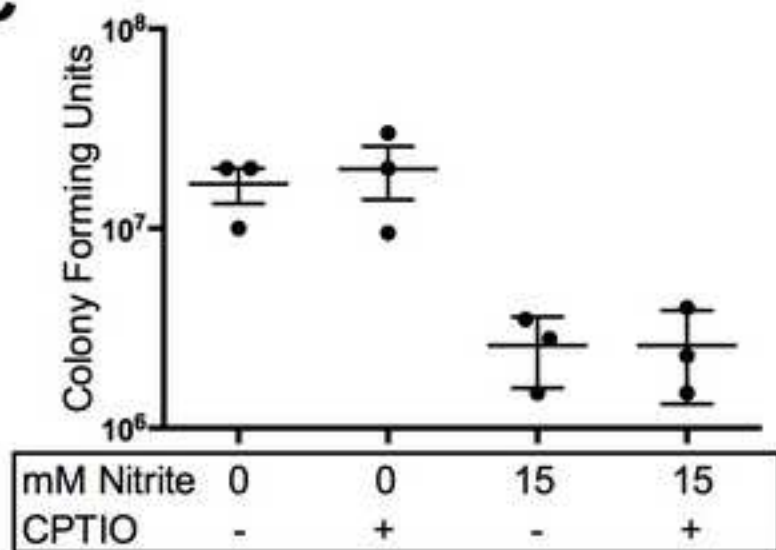

Supplement: NIHMS628569-supplement.pdf [file NIHMS628569-supplement.pdf]
